# Supplementary material for: ER Stress Signaling Promotes the Survival of Cancer “Persister Cells” Tolerant to EGFR Tyrosine Kinase Inhibitors
Source: Oxford University Press journal article supplement (doi:10.1158/0008-5472.can-17-1904), 2017-12-19
Supplement: 00085472can171904-sup-185422_2_supp_4436443_p0lsrs.xls [file 00085472can171904-sup-185422_2_supp_4436443_p0lsrs.xls]

## Sheet: CP1070_20160927.txt
Barcode Sequence	Annotated Gene Symbol	Annotated Gene ID
AAAAAACGAACGGATTAACA	ABCG2	9429
AAAAAAGTTCTCTTCATTCA	UBE2G2	7327
AAAAACACCAAACTCAAAGC	UBE2G2	7327
AAAAACAGAAAAAACTGACA	CDY2B	203611
AAAAACTGCCAACCAACTGA	RAD50	10111
AAAAAGGACTAGTATAGGAA	ABCG2	9429
AAAACAAAAGCAGATGACCG	CCNT1	904
AAAACAAGGGAGCTACAAGT	DAAM1	23002
AAAACACATCAGTATAACAT	RHOA	387
AAAACAGAGACTCAGCAAGG	ATP6V1E1	529
AAAACAGTTAGCCAGAGGTT	PIK3CA	5290
AAAACCAACTGTTATCAAGA	NUP62CL	54830
AAAACGAAATAGAAAAGCCA	UBE3C	9690
AAAACTGGTTGGTATTGAGA	DDB2	1643
AAAACTGTCATACATGAATC	RAB6A	5870
AAAAGAAAGCCATGACTGTG	KDM4D	55693
AAAAGAATCCAACGTGCAAG	PPP2CA	5515
AAAAGAGAGAGATTCTGCTA	RNF20	56254
AAAAGATAATTCGAGAACGA	HERC2	8924
AAAAGATCAACAAAATTAGG	PPP2R2A	5520
AAAAGCACATGATAATTGGT	CTAGE1	64693
AAAAGCAGGCCCGGGAACAA	FGFBP1	9982
AAAAGCATATGATAAAGCTG	SMN1	6606
AAAAGCTGTACGTTATATGT	NCBP2	22916
AAAAGGAACAAAGTCACTCC	BRD7	29117
AAAAGGAATCAGAATCGAGA	PDRG1	81572
AAAAGGCCTGACATATCTGA	MAP2K1	5604
AAAAGGGCTATTCATTTGTC	TIAL1	7073
AAAAGGGTTGAAAAAGCCGA	PIK3CA	5290
AAAAGGTGTTCTGAAGCCGC	CCNI2	645121
AAAAGTGAAGTACTCACGGC	PWP2	5822
AAAAGTGGGAAGTACGTCCT	RPL30	6156
AAAAGTTAATGAAGAAGAGG	CCNI2	645121
AAAAGTTACATCAAAAATAA	CCSER2	54462
AAAAGTTTCGATTACCTGCT	MOB4	25843
AAAATACGGATCACAAGTTG	IGF1R	3480
AAAATAGAGAATTACTGGAA	RGPD5	84220
AAAATCAGTAGATTCCACAC	SERPINB4	6318
AAAATCCAGTCTCATAGCAG	PPP2R2A	5520
AAAATCCCAAAACAGAAAGA	CDKL2	8999
AAAATCCCATTACCACACAC	ADAM18	8749
AAAATCTACAGTCATAGGAA	HPRT1	3251
AAAATCTCCTGCCAGTCAGG	ABCE1	6059
AAAATCTCTGAAATTTGGGG	PRY2	442862
AAAATCTGCTCCTTCTGCTG	RBMY1E	378950
AAAATCTTCCAAGTATTAAG	RBM14-RBM4	100526737
AAAATCTTTGATGTGCGCAA	SEC13	6396
AAAATGAAGAAAACAGCATG	NCBP2	22916
AAAATGACAGAAACCCAAGC	FLT3	2322
AAAATGCAGATCACATCCTG	TIMM21	29090
AAAATGGAGAGCCTTCAGCA	WWP1	11059
AAAATGGAGTGGATATGTTG	ZEB2	9839
AAAATGGATTATCCTGAGAT	CASP3	836
AAAATGGCTACACCTCCCGA	KDM1B	221656
AAAATGTCAGACAAGCTCAA	BRCA2	675
AAAATTCCAGCCCATCTGAG	NEDD4	4734
AAAATTCTTGAACCACCTGA	MOB4	25843
AAAATTGGAGCATGTCGTCA	U2AF1	7307
AAAATTTCAACTTACCAGAG	PDRG1	81572
AAACAAAACATCATCATCCC	KCTD9	54793
AAACAAAAGCTATTACAATG	ARHGEF7	8874
AAACAAACCTGGCTAAACGT	U2AF1	7307
AAACAAGAAAGGTCCTCGAG	UBE3A	7337
AAACAATCAAAGGACCGAGA	RB1	5925
AAACAATCACTGTTACTCCG	CDK15	65061
AAACAATGCCTATCCTCACA	NHLRC2	374354
AAACAATGGGAAAGGGCCCA	DSC3	1825
AAACAGACGAATGGAAAGGC	CASD1	64921
AAACAGCAAGATGTTTGAGG	PAPOLA	10914
AAACAGCACAAGTTAGACAC	RAD50	10111
AAACAGCAGCAAATCAAAAG	TCEA3	6920
AAACAGCCAAAGTAAAGTCA	FGFR1OP	11116
AAACAGGTCCTTAACTACCT	POLR1B	84172
AAACAGTCCGAAGAGCACAG	TAF5L	27097
AAACAGTGCTTACCCAAGAT	FRMD6	122786
AAACATCGACGAAAAGGGGC	UBE2L3	7332
AAACATGCGCTGAAGTTTAG	CUL1	8454
AAACATGGTCCCATATCAGA	RBMY1J	378951
AAACATGTTCACAACGGGCA	JARID2	3720
AAACATTCGGAACACTATGG	KNTC1	9735
AAACCCACAACCACAGACAT	KIRREL	55243
AAACCCAGTTTATCTACAAG	KDM3B	51780
AAACGAAGCTGTCTTAGAGT	IL6ST	3572
AAACGCATCCCATTTCTCTG	SHROOM3	57619
AAACGTAAGTATCTGGATGA	METTL14	57721
AAACTCACCAGGGCCCTCGA	UBE2S	27338
AAACTGACCTACGACAGGCC	TDP1	55775
AAACTGGGTGTTGAGATACC	CUL2	8453
AAACTGTTCATGAAATCTCG	FMR1	2332
AAACTTCATACTGACCTTAG	UBE2E2	7325
AAAGAAAAAATCCTTTGCCA	USP6NL	9712
AAAGAAAAACCAGCATCAAG	SYTL4	94121
AAAGAAAATAAACTATCAAG	PTCH1	5727
AAAGAAATTACCTCTCTGAC	CABS1	85438
AAAGAAGAGACATTTAGACC	TRIP12	9320
AAAGAAGTCAAGGAGTTACG	C10orf12	26148
AAAGAATGCCACAGAATCAG	SAV1	60485
AAAGAATGCCAGCTTTGAGA	CTAGE1	64693
AAAGACCCTAAAGTACAGAG	BRCA2	675
AAAGACCCTGTGAATCAGAG	SHC1	6464
AAAGACTTACTCCAATGAGG	CDK18	5129
AAAGACTTGCTCCAAAACAC	NO_CURRENT_1	NO_CURRENT_1
AAAGAGAACTGCCGTCCTGA	EXOSC8	11340
AAAGAGAATTGAGTGCTATG	PFKFB1	5207
AAAGATAAAAGCCGTTCTCC	ATR	545
AAAGATATATTGGGCACCAT	GTF2A1	2957
AAAGATGAGGAGGGTTGCTC	ARL2	402
AAAGATTAGATATTCTAAAG	CEP350	9857
AAAGATTTCAGCCTATAGTT	TAF9	6880
AAAGCAAAAGAATCCGATGG	BBX	56987
AAAGCAGAAAGATGTCGCTG	CDC123	8872
AAAGCAGAGGGCATAGATTG	SMUG1	23583
AAAGCAGAGTGCATACATAA	RCHY1	25898
AAAGCAGTATTTGGGAAACA	RBMY1B	378948
AAAGCATATGTAGCAACTCA	PTPN12	5782
AAAGCATCTTCAATGTCTGT	LHFPL2	10184
AAAGCATTGAAACGATATGA	OSBPL1A	114876
AAAGCATTGCGTACTAACCC	CTR9	9646
AAAGCCAACAAGTTAGACCA	PRMT1	3276
AAAGCCAATGACCCCCAAGG	CDK10	8558
AAAGCCAGAAACAAGTTGAC	CDK2	1017
AAAGCCCCTGAAATCAACAG	LCMT1	51451
AAAGCCCGTAGCCATATGAG	FURIN	5045
AAAGCCGGCAATAAACACAC	TBCD	6904
AAAGCGACCTTTCCCCACCA	TGFBR2	7048
AAAGCGGGTTAGCTCCACTA	BIRC6	57448
AAAGCTCCAATAATCAACAG	CHUK	1147
AAAGCTCTCAAAGCAAAGCT	CDKL5	6792
AAAGCTGTTCATGTGAACCA	FLT3	2322
AAAGCTTATCGGTTACGAGA	TADA1	117143
AAAGGAATTTGTGGCCAAAG	NAE1	8883
AAAGGACGGCGATTACCTAA	LSM5	23658
AAAGGATTCTGTTGTAACTC	PPP3R1	5534
AAAGGCAACGAAGCTTATAG	ARHGAP21	57584
AAAGGCAGCCAAGAGCACGT	MGRN1	23295
AAAGGCCTCCAAATAGACGT	CYLD	1540
AAAGGCTGACTTAGGCCTAG	MAGED1	9500
AAAGGGCTAAAGTAGCTCCC	DHX29	54505
AAAGGGGTCGTAAACGCAGG	KAT6B	23522
AAAGGGTGAACAGATCGCTA	CTNNA2	1496
AAAGGTCCAAGAAATTAATA	MED7	9443
AAAGTAGAGAATTACTGGAA	RGPD3	653489
AAAGTAGATGCCCAATTTGG	YARS	8565
AAAGTAGCTTCACTCTCTCG	CDC16	8881
AAAGTAGTGTTGACTAAGGG	RICTOR	253260
AAAGTATAAGAAAGAACAAG	LEKR1	389170
AAAGTATGGAATGCACACAA	WDR48	57599
AAAGTCACAAAGCTTAATCA	CDKL1	8814
AAAGTCCGTGGACATGTGGT	CDKL5	6792
AAAGTGCCGAAACAAGAAGA	ATF3	467
AAAGTGCTCAAATCATGAGG	CCNB3	85417
AAAGTGGGAAGTACGTCCTG	RPL30	6156
AAAGTGGTGCATTCGAGGAG	RNF165	494470
AAAGTTCAGTAATAATCCCA	SETDB2	83852
AAAGTTGCCAAAGTTAGCCA	SAE1	10055
AAAGTTGTATTCATACCTCC	CDC26	246184
AAAGTTGTCTATATTAGTTG	HERC3	8916
AAAGTTTGAGCTCGAGAGTG	KMT2D	8085
AAAGTTTGCCAACCATTGAG	MAP3K1	4214
AAATAAACACATCACCCACG	PHLPP2	23035
AAATAATCATCTGTCCCTCC	SETD4	54093
AAATAATTAAGTATGCACAT	MED4	29079
AAATACATGTTGGGGCATGG	FZD6	8323
AAATACGCCAAGTCATCTGT	SUPT5H	6829
AAATACTCACTGTTCTGCAC	UBA2	10054
AAATACTTACTTCAGTTACC	GGPS1	9453
AAATACTTGAAGGACGAAAG	CDC16	8881
AAATAGAGGCAAGCCCAATT	QKI	9444
AAATAGGATTGCGAATCAGG	BRD1	23774
AAATAGTTGCAACAAAAGAG	KMT5B	51111
AAATATAATAGCTGGCATCA	KIT	3815
AAATATCAAGTATATATGGT	CBLB	868
AAATATGCAAAGCAACTCAA	CCNK	8812
AAATCAACAGGTTCGTCACA	ROCK2	9475
AAATCAAGTAACCTCAGCTG	SUPT20H	55578
AAATCAATGAGCTAGTTGCT	SETD9	133383
AAATCACAAACTAGATGCAA	CCDC68	80323
AAATCCAAACTGCAACAAGA	CCDC68	80323
AAATCCAAATCAGAACTACT	CDKL3	51265
AAATCCTGATAGTGGCATCG	PRPF19	27339
AAATCCTGGAAAAAATTATT	TCEA1	6917
AAATCGACTTCGGTTTCAGT	MED31	51003
AAATCGGTGAATTATAGATG	KDM4D	55693
AAATCTCAAGCTTCCGTCAG	MED15	51586
AAATCTCAGATGACAGAACC	IMPACT	55364
AAATCTCTGAAATTTGGGGT	PRY	9081
AAATCTGATCAGACACCAAG	MED1	5469
AAATCTTGTGAACCTCATCG	CDKL4	344387
AAATGAAAGAGTACACGTCA	DTNA	1837
AAATGAACTTGTGTTGAGTT	C2orf76	130355
AAATGACAGCAACTGAACAA	MOB4	25843
AAATGAGTGGAACCTTGAGC	NUP62CL	54830
AAATGATACTAAATCCAGAG	RBM12	10137
AAATGATCATAGGCCAGTAA	ASUN	55726
AAATGATGCAGGACTCACAA	RAC1	5879
AAATGCAGACTCTCCCATCA	UBE2G2	7327
AAATGCTGGTCTCATGCAAG	HERC2	8924
AAATGGAGAGACTCTTCTTG	ARFIP1	27236
AAATGGATAGATGGAAGTGC	C21orf91	54149
AAATGGATGGATTTGCTGAG	CDKL2	8999
AAATGGCTGTTGATCCCATG	KMT2D	8085
AAATGGCTTTACCTAGGAAC	SAR1A	56681
AAATGTACGAGCACTTCAAG	PTCH1	5727
AAATGTAGAAACAGGGACAC	CDKL1	8814
AAATGTATAGGGTCGCTCCA	NEDD4L	23327
AAATGTCAAAATTAGTGATG	RFC4	5984
AAATGTCATTGAGCGACTCC	UXT	8409
AAATGTGATTGCCTTCGCCA	CASP6	839
AAATGTTACTGACCTTTCAG	PTPN11	5781
AAATGTTTCCATCGTAGTCG	EXOSC8	11340
AAATTAAGAGAAGGTAAAGC	RGPD6	729540
AAATTAGAGCGCATTGGGAA	STK26	51765
AAATTATCTGACAAAGACCA	RGPD8	727851
AAATTATCTGAGAAAGACCA	RGPD1	400966
AAATTATGGCGAGTTCAGTG	GHR	2690
AAATTATTCTCATCACGATA	RGPD6	729540
AAATTCCTAGTGATTTAGAG	MED17	9440
AAATTCGGTCTTCATAGATT	PHOSPHO2	493911
AAATTGGCTTTCGTTCGTGC	NO_CURRENT_2	NO_CURRENT_2
AAATTGGTGTCGGTGCCTAT	CDK4	1019
AAATTGTACCAGTTGTGCAC	GTF2F1	2962
AAATTGTTATTTATATAACA	BRDT	676
AAATTTGAATTTACCAACAC	UGDH	7358
AACAAAAAAACATCCAATCA	CEPT1	10390
AACAAACAAGAGGACTGTGT	RNF7	9616
AACAAACCAGAAAATTGTTG	CHUK	1147
AACAAAGAAGACCACACACT	POLR2J	5439
AACAAAGACATACTCCAATG	CDK16	5127
AACAAAGGTGCATTACCCAC	TRIP12	9320
AACAAATACTTGGCAAAAGG	PRMT3	10196
AACAAGAATTGTAATGACCC	CYLD	1540
AACAAGACGTGTGAAGACTC	KDM5A	5927
AACAAGCCTGCAGAACTGAT	CUL4A	8451
AACAATGGCAAGTTCTACGT	RAD52	5893
AACAATTAGGAAAAGAGCAC	FARSB	10056
AACACACCTGTCTACGCTAC	TGIF1	7050
AACACCCCGATCCCCCAAGG	SEC23B	10483
AACACGCTGCTGGACTCGAG	FGF6	2251
AACACTCAGAAAAACAGTTG	GTF2I	2969
AACACTCCAAAGAAATGACC	G6PC2	57818
AACACTCCAGAGATCCACGG	CDK6	1021
AACACTGAGACAGTATGCCG	SKP2	6502
AACAGAACATCGGCACATAG	RHOBTB1	9886
AACAGAGTATTTGAGCACCA	GTF2H2C	728340
AACAGATATCTCGAGTAAGA	CTDSPL2	51496
AACAGATGATATCCCTGTTT	SKP1	6500
AACAGCAAACCCCCCAACAT	DRG1	4733
AACAGCAATCCATATTTAGT	ANAPC1	64682
AACAGCACCAGAAAAAATAG	PNPLA4	8228
AACAGCATGAGAACTTGACA	HDAC9	9734
AACAGCCAAATACCGATCAA	GPR65	8477
AACAGCTACTACTTGTCCAG	CDKL4	344387
AACAGCTGTTTACCAAGCGA	MED4	29079
AACAGTAGTCGCTGTTGGAT	HSPE1-MOB4	100529241
AACAGTGAGTGGATCCCACA	MED13	9969
AACAGTGGGATTACGGTCCA	TBPL2	387332
AACAGTTATTGGAATCTCTG	BRAF	673
AACATAATAGACACGTCCGT	WWP2	11060
AACATACAAGCATATTAATG	DYRK1A	1859
AACATATCAAGCCATCGATG	DSG3	1830
AACATCCGCGAGTTCCTGCG	ARHGEF7	8874
AACATCTAATGGACTTCCAG	RB1	5925
AACATCTCCGAAAGCCAACA	EGFR	1956
AACATCTTCATGCCTATGTG	ACE2	59272
AACATGCCAGAAGATATCTC	CDC16	8881
AACATGCTAGGATTCCTTGG	PAPOLG	64895
AACATGGAAGAATCCAACAA	STAT3	6774
AACATGGTCAACGTCTTGAA	GTF2H5	404672
AACATGTATGTGTGAAGCAT	ANAPC4	29945
AACATGTCTTAATGCAACAC	ZNF217	7764
AACATTACTCACATTGGCAA	EMP1	2012
AACATTCAGGACACATCCGA	ERCC5	2073
AACCAAAAGTTGTTACAGGC	MED4	29079
AACCAACAGGTCCTGAACCA	NRIP1	8204
AACCAATCACCCTGTGATGG	ABCA6	23460
AACCACCTCCCGGACACCTA	FOXF1	2294
AACCACTCACCAAATCCATG	DTNA	1837
AACCACTGTAGGGTTAGCAT	FBXO11	80204
AACCAGACCAGACACTGCGG	DTNA	1837
AACCATAAGCCTCTTCAAGG	CBL	867
AACCATCCTCTTCATAACAG	MED27	9442
AACCCCAAGACTGAGGTGTG	IGF1R	3480
AACCCCACCTTGGCAAGTCT	UBE2L6	9246
AACCCCACTTACCTATCTCC	NABP1	64859
AACCGGCCAGAGGACGAGTG	ERBB2	2064
AACCTAATGGATCCCTGGAC	MMS22L	253714
AACCTCCCCGAGCTAACCGA	MYO9B	4650
AACCTCGAACCATAGGATCT	PIK3CA	5290
AACCTGAACGCTATGACCTG	KDM4D	55693
AACCTTACTCCAGCAAACAC	CDKL2	8999
AACGAAGACCCTACTAGGCA	UTY	7404
AACGAGAAGACCCCAAAACC	TCEA3	6920
AACGATGTGCCTGTGACTGA	CABYR	26256
AACGCATCACCATTCTTCGA	PPP2CA	5515
AACGGCAGTTGGAGGCTGCG	WDR77	79084
AACGGCTACCCATTGCCTGA	REPS2	9185
AACGGCTACGTGCTGGACGG	UBE2QL1	134111
AACGGGCAGATCGGTTTCCG	TXNRD1	7296
AACGTCTTGAAGAACAATGG	WWP2	11060
AACGTCTTTGAAGAAAGCTG	GTF2H2	2966
AACGTCTTTGAAGGAAGCTG	GTF2H2C	728340
AACTACCTTTCTACGGACGT	ERBB2	2064
AACTACTAATAGTAGTTGGG	PICALM	8301
AACTACTTTGAGAGCACCGA	ARL2	402
AACTAGAGGAGCTTGTAGCA	SPTLC2	9517
AACTCAAAGCCAAAACCACT	SUFU	51684
AACTCACCAGCAGTACGTGT	UBE2S	27338
AACTCCATGCTTATGACACA	UBA7	7318
AACTCCCTGGAGATAAACTT	BRDT	676
AACTCCTGGCGGGACTGACG	SEPHS2	22928
AACTCGGGGGGAAGTTGACG	PARP1	142
AACTCGTAAGTGCTACCGCA	PFDN2	5202
AACTCTAAAAAAGAACCGAG	CASP2	835
AACTCTTCTGAATCAGACAA	LEKR1	389170
AACTGAAGGCATGTCATTGC	CCNG1	900
AACTGATGAGACAATTGCAG	BRD7	29117
AACTGCATCCAACAATGACT	SIAH1	6477
AACTGCTAAGGAGAGATCAA	TMEM260	54916
AACTGCTAGCTTTATTGACG	HAT1	8520
AACTGGTTCGAAAACTTGGT	CSNK2A2	1459
AACTGTGGTGTGTTATGGAC	ERCC6L2	375748
AACTGTTCCAGGGCCAGTAT	ARHGEF7	8874
AACTTCACTGGTTAAAACCG	ASUN	55726
AACTTCCCACCAACACACAG	SEC31A	22872
AACTTCCGGAACCCAAAAGG	ST3GAL5	8869
AACTTCCTGATTGGTCGACA	CSNK1G1	53944
AACTTCTTAATAGGACGACC	CSNK1G3	1456
AACTTCTTGTGTGTCGCTCA	FGF7	2252
AACTTGAAGCAGACAGATCA	C18orf54	162681
AACTTGATGAACTCCAGTTA	CACYBP	27101
AACTTGTCTTCCCGTCGTGT	PTEN	5728
AACTTTAACTATGACATCCC	SAE1	10055
AACTTTAAGACTGCTGTGAA	UFM1	51569
AACTTTCGGATGCACAACCG	GBP2	2634
AAGAAAATGAGCTACTACTG	ARID4A	5926
AAGAAAATGGTTGCTGCAGT	CABS1	85438
AAGAAAGCACTCCCTGACTG	CCNA1	8900
AAGAAATCCTCACAATCTGA	SETD2	29072
AAGAACACTCTGATTATGTG	UTP15	84135
AAGAACATAAATCTCTGACA	KMT2C	58508
AAGAACATCATCCTGGAGGA	CFL1	1072
AAGAACGGCAGGGAGTTCCG	FGFR3	2261
AAGAACTCACCCCGTCACGA	HERC2	8924
AAGAAGACCTAATTTCACCA	PALB2	79728
AAGAAGCCAAAGAACTGGCT	UBE2J1	51465
AAGAAGGTCCCTCTCCAAGA	PTPN12	5782
AAGAAGGTCCTAGTTATCCA	CYB5R4	51167
AAGAAGTATCAGGATGAATA	RNF138	51444
AAGAATACCTTATAACAAGT	NAPG	8774
AAGAATGATATTGTCCATCG	CDKL5	6792
AAGAATTGAAACCGCACAGC	COG3	83548
AAGACAAATGGATGTTCTCT	GTF2F2	2963
AAGACAAGACCATCAAATCC	TRAF6	7189
AAGACAGAACCATAGTAAAA	LUZP4	51213
AAGACCAACTATGTTGTTTG	CDC73	79577
AAGACCTGAACTATCCCCAG	UBE3D	90025
AAGACGCCGCCGGAGACCGG	LATS2	26524
AAGACGTCCACCTCGTCTGG	GATA2	2624
AAGACTACCTCATTCAAAGA	CHD7	55636
AAGACTAGAAGCTCAACTGA	CCNG1	900
AAGACTCCCATTCGACAACA	CD44	960
AAGACTTTGTGATTGTCCGC	SKP2	6502
AAGAGAAAAGGCATTCGATG	OGG1	4968
AAGAGAAAGGAAAAGACGAA	LUC7L3	51747
AAGAGAATAGCTTTCTCCAG	FGF10	2255
AAGAGACCATTAAAACCTCC	BRDT	676
AAGAGAGAAAAAGTTTGCTG	CTAGE1	64693
AAGAGCAATGCGTCGACCCC	CBLC	23624
AAGAGCACGTCCTTTCGACC	SETDB1	9869
AAGAGCCGGGAGCTCAACAG	SRRM4	84530
AAGAGCGGACCTCAGAACCA	FBXW7	55294
AAGAGCTTTAACCCTCCGTG	UBE3B	89910
AAGAGGAGTACAGTGCAATG	KRAS	3845
AAGAGGATACCTCTCGCGCT	MAP4K4	9448
AAGAGGCATTGCTCTATGGG	EIF3B	8662
AAGAGTCACCTAAAGTTAGG	CDK14	5218
AAGAGTCTTCCAAACCAGTG	GTF2F2	2963
AAGAGTTACATTGCCACACA	PTPN11	5781
AAGATCAAAGACGCCAGGAA	KMT5A	387893
AAGATCAGTAGCGGTCCCGG	KMT2A	4297
AAGATCCGTACCATTGCCCC	NEK9	91754
AAGATCGGGTACAGCAACAA	NRP1	8829
AAGATCGTAGCCAGACCCCC	ZNF141	7700
AAGATCTTCCACCCGAACGT	UBE2S	27338
AAGATGACGACGTCCCAGAG	TBCD	6904
AAGATGCGCATGGCTCGATG	KMT2B	9757
AAGATGCTATACAATGCAAG	INTS9	55756
AAGATGCTGAGCGCTCACAC	ZNF703	80139
AAGATGGATAAATGGCATGC	UBA3	9039
AAGATGTAATACAAGTTCCA	FMR1	2332
AAGATGTTACTCATGATACG	CYB5R4	51167
AAGCAAAAGATGCCTGCCTG	NAPG	8774
AAGCAATGGGGCTGGACACA	RPL17	6139
AAGCACATAAAGATGAACGG	NSD1	64324
AAGCACGACAGATTATAACC	ARHGAP21	57584
AAGCAGAAGATTTCACAAGC	TAF4	6874
AAGCAGAGAGATCTCTCGGA	CDK2	1017
AAGCAGCCAGACATCACGGA	CCNA1	8900
AAGCAGCCATCCTATATTGG	CHD1	1105
AAGCAGTGACCATTACACTG	ERBB3	2065
AAGCATAAAATCTATCACAG	ERCC6L2	375748
AAGCATGGCTTGTAGACCCG	RARG	5916
AAGCCAGTTGCTGAAATGGC	TAS2R31	259290
AAGCCCCACCTAGACCGCAG	TSPY3	728137
AAGCCCCATCAACCCATACA	ZEB2	9839
AAGCCCCATTAGTGATGAAG	SNAI2	6591
AAGCCCTCCTTACAAATGGG	UBE2I	7329
AAGCCTCACCACTTGACCAG	JMJD7-PLA2G4B	8681
AAGCGCCTCCTCAAGTCATA	WWP1	11059
AAGCGCTCAAATCGGACCAA	HUWE1	10075
AAGCGGCGTGATGAAATGCT	RAD50	10111
AAGCGTGATGTACAGGCAAG	TAS2R4	50832
AAGCTAACGATGAAAATCGG	KNTC1	9735
AAGCTACGACTAATAGACTG	CSNK2A3	283106
AAGCTAGCATGGAGTTTCGA	RALGAPB	57148
AAGCTCCATTGGCAGAAGAA	EIF3B	8662
AAGCTCCTTCTCCATCACAC	RFWD2	64326
AAGCTCGCCAAGATCGGCCA	CDK9	1025
AAGCTGATATCACACGTCTT	UBE2M	9040
AAGCTGCAGTATTCTTCTTT	SMN2	6607
AAGCTGCATAATCAAAACTG	UTP15	84135
AAGCTGCATCCCTTTGATGC	HDAC11	79885
AAGCTGTAAAATGATAACAG	TIAL1	7073
AAGCTGTAACCACTAATCAG	SEC23IP	11196
AAGCTGTTTATCCATTCCAT	CARD16	114769
AAGCTTGATCATCATACCTT	BPY2C	442868
AAGCTTGCTAGGGATTACAG	AMD1	262
AAGCTTGGCTGCGAGAGCAT	ZSCAN30	100101467
AAGGAAAACTGATCAGACTG	UBE3A	7337
AAGGAAAGAGTCTACTGTCG	SETDB1	9869
AAGGAAATCTTCTACACAAG	CFL2	1073
AAGGAACAGCTGCTGTCCAG	CTIF	9811
AAGGAACGTATCCCGGGCAA	SETDB1	9869
AAGGACTGGAATATGGAGAG	NO_CURRENT_3	NO_CURRENT_3
AAGGAGACAGAGGTGTCGGA	SETD1A	9739
AAGGAGCAGTGCATGACTGA	CCNB3	85417
AAGGAGCCAACATAACAGAT	BRCA1	672
AAGGAGGAGGAGTCGGCGGG	UBE2M	9040
AAGGAGGCAAACTTCACAGA	SETBP1	26040
AAGGAGTCTACGAAACGTGG	SETDB2	83852
AAGGATAGCAATCGTAGGGT	DCLRE1B	64858
AAGGATTGTGGACAATAAGG	CCNH	902
AAGGCAAATCAGAGTTGCGA	APC	324
AAGGCACACCATCTGAAGAG	XPC	7508
AAGGCACTTTCATTGATGTG	DET1	55070
AAGGCAGAGGTTCCACTGAA	CCNJ	54619
AAGGCATTGCTAGGCCCTCG	ELOVL5	60481
AAGGCCAAGAAGACCAACGC	FOXF1	2294
AAGGCCAAGATGAAGGTGTG	HSPE1-MOB4	100529241
AAGGCCAGGTATCCCCGAGA	TDGF1	6997
AAGGCCATGCGTAGTCACGA	MED23	9439
AAGGCCCCGGAGTGCACCAG	TCF7	6932
AAGGCCTAGATATTTACTGG	GGPS1	9453
AAGGCGAAGAACCTCAACGG	MSH6	2956
AAGGCGACCTGGACGAGCGC	CCNI2	645121
AAGGCGATAACATCTATGAA	UBE2E1	7324
AAGGCGATTATGTTACCACC	EIF3B	8662
AAGGCTCCCATGATTCTGAA	CBFB	865
AAGGCTCCCTTATCATATGG	UBE2L3	7332
AAGGCTGTGTTCCCACACGG	CDK20	23552
AAGGGAAATCTGCCAAAGAG	GTF2E1	2960
AAGGGAAGCCTGATGCCGAA	REPS2	9185
AAGGGAATTTATCGTGTGTG	ARHGAP29	9411
AAGGGACATGGCTTGCAGTG	PSMA4	5685
AAGGGCAGAAGTCCCGCCGA	SRRM4	84530
AAGGGCGGCATGCCCGACAT	RBM12	10137
AAGGGCTTGAGTGTTCAGAC	TCEA3	6920
AAGGGGGAGATATCATGCTC	DDB2	1643
AAGGGTTGTGTGAAGACAGG	CDK10	8558
AAGGTCAAGATCACCACATG	RBM12	10137
AAGGTCACTTACCTTTCAAG	CCNG1	900
AAGGTCAGACTCGATGTCCG	DUSP6	1848
AAGGTCCGCTCTCGGACGGG	JUN	3725
AAGGTCCTGACACGTCACGT	E2F1	1869
AAGGTCTGGACCACATACGA	ZFP14	57677
AAGGTCTTAGAATCATTGAT	ORAOV1	220064
AAGGTGAAGACAACTCAAAG	DSG1	1828
AAGGTGCTGTACTCGCACAG	PTGER4	5734
AAGGTGGAAAAAGACTCGAA	DDX10	1662
AAGGTGTGTACACTGTCTAA	ZFP14	57677
AAGGTTAAGACTCTTCAACT	PHLPP1	23239
AAGGTTATGCAAGGTCCCAG	CTNNB1	1499
AAGGTTGTCTGATTCAGGGA	UBE2C	11065
AAGTAAATGTTCGGTCACAG	CSNK1G1	53944
AAGTACATCTTGGCCAACAT	KDM3A	55818
AAGTACATGGACTCCACCCC	CDK3	1018
AAGTACTGGCGTGTATCCAT	TRAPPC13	80006
AAGTAGCCAAACAATAACCA	RNF214	257160
AAGTAGGAAATCCATAGTGT	NFKB1	4790
AAGTAGGCCTGAAACGTCTT	YPEL3	83719
AAGTCACATTAATGATGAAC	TAS2R4	50832
AAGTCACCAGTGCCAACTCA	SMURF1	57154
AAGTCAGCGAGGTCGACCCT	SNAI3	333929
AAGTCCATAGATGCAGGACC	WDR61	80349
AAGTCGACATACTCTCGGCT	CBFB	865
AAGTCGATCTCATAGACGTA	ZBTB7C	494471
AAGTCGCGAGACATCGGCCA	FGFR1OP2	26127
AAGTCTACAAACACAGCCCG	TUBA1B	10376
AAGTCTGTCTGCCATTGATA	AIFM1	9131
AAGTGAAAGTCCGATTGTAG	SEC11A	23478
AAGTGACATACCCACCCAGA	GTF2H4	2968
AAGTGACATTTGTTCAGGGT	PAPOLA	10914
AAGTGACGTGGAGGATCACT	DTYMK	1841
AAGTGATGCTGGGACAGTCG	ATXN7	6314
AAGTGCACGCGGATGCTCGT	SOCS1	8651
AAGTGCACGGAGTCTCACAC	FURIN	5045
AAGTGGAATACGTAGACATT	BIRC3	330
AAGTGGAGGCAGCAGTGACA	SIRT3	23410
AAGTGGATCAGATAGCTCCG	BIRC6	57448
AAGTGGCAAAGCGAATGTTG	KDM3B	51780
AAGTGGGTCCGACTCAACGT	KCTD5	54442
AAGTGTATGCATAATTTACA	KLHL23	151230
AAGTGTGGTCCCATCTGACA	FGFR2	2263
AAGTGTGTTGTTGTGGGCGA	CDC42	998
AAGTTACCTCACCAGCCGCA	MGRN1	23295
AAGTTACTGTTGGCGAGCTG	NEDD4L	23327
AAGTTCAAGCAACCGTCATT	RPS23	6228
AAGTTCCACCGAAGTCAATG	KDM7A	80853
AAGTTCCCAACCAAGTGTTG	PRPF19	27339
AAGTTCTTTACCTTTACCAG	ATP6V1E1	529
AAGTTGATTGAAAAACGTCA	CHST9	83539
AAGTTGCGAATGGATCCCAA	SIAH1	6477
AAGTTTACCAAAATAGGCTC	CCNB1	891
AAGTTTGCCTACAATGACCA	SUV39H1	6839
AATAAAAACACTTACATGGG	METTL14	57721
AATAAATCAAGGTCATAACC	HPRT1	3251
AATAACTACTTCGATGTCTA	HRH4	59340
AATAAGAGCAGCCTGAGTAG	EP300	2033
AATAAGCACATTGAAGACAC	RICTOR	253260
AATAAGCAGTTGGCTCACGG	KIRREL	55243
AATAATTCTAGAGTAACTGT	CCNT2	905
AATAATTGCACTTACGATGT	EZH2	2146
AATACAAACCTGGTCTACGT	ITCH	83737
AATACAGTAGACCCACACAC	UBE2U	148581
AATACCTGACTTCAGGTCAA	SIRT1	23411
AATACCTTGCTTCAGTCCAA	BPY2B	442867
AATACGGTAGATGCATCAGT	EMP1	2012
AATACGGTGACAGCTCGGAT	TCF7L1	83439
AATAGAAGACATTCTATTCA	GTF2H2	2966
AATAGAGACCAATCGGAACA	ANKHD1-EIF4EBP3	404734
AATAGAGGCTGGACTAATCG	TLE4	7091
AATAGAGTACTATGCTATGT	RPL30	6156
AATAGGAGAATCCTCCATAG	TADA3	10474
AATAGTACCTGTGAAAATCT	BPY2C	442868
AATAGTATCAAGAAGTACAC	NAMPT	10135
AATAGTCCTCTATGTCCCCA	ARIH2	10425
AATAGTGTGGAAGCCTTCTT	ARRDC3	57561
AATAGTTGGATGGGAAGCCA	RBMY1F	159163
AATATAAATATGCTAAAGGA	PAPOLG	64895
AATATACAAAGCAACTGTCA	JAK2	3717
AATATATAATTGGTCTCTCT	FZD6	8323
AATATCGTTCAGCAAGAATG	VWA9	81556
AATATCTCTAAGATCTACAC	CCT4	10575
AATATCTGAGGCACTTCATG	SIRT1	23411
AATATGAAGGAAACTTGACT	TAS2R31	259290
AATATGACTAGCAACAAGTC	TGFBR2	7048
AATATGAGCATCAAGAGAGC	WDR61	80349
AATATGGAAATGCTAATGCC	PPP6C	5537
AATATTACTGATGACAGCAG	CDY2B	203611
AATATTAGGATGGTTCACAC	MAP3K7	6885
AATATTCTAATAACTAAGCA	CDKL4	344387
AATCAACTGAATCGTATGGA	SUPT7L	9913
AATCAAGCATCCTTAAAATG	DYRK1A	1859
AATCACCAGTTTCTTCCGGA	RHOA	387
AATCACTATCAATGCTCGGA	RNF20	56254
AATCAGAAGTCATAGGTGAT	FARSB	10056
AATCAGACAGCATGCTTAAA	CUL4B	8450
AATCAGTGACCCCCAACCCA	DET1	55070
AATCAGTTAGTGAAAAAGAG	UBE2J1	51465
AATCATTTAAGAATAGAGCC	SETD9	133383
AATCCAGTGCCCTATAATGA	RPA1	6117
AATCCATGTACTGACCAGGA	CDK1	983
AATCCGCTCAGGCTCATCAG	SMARCC2	6601
AATCCTAACAATCCCTCAGG	KCTD9	54793
AATCGAAATTCCACTTGCGC	CDKN1B	1027
AATCGAACTGGTGTGTCCAA	DAZ2	57055
AATCGAATTTACTCTCATAT	ERCC5	2073
AATCGATCCAGATCTCCTCA	GHR	2690
AATCGCAGGTATCCCAGAGC	NO_CURRENT_4	NO_CURRENT_4
AATCGCCTGCTACAAAAACA	SBDS	51119
AATCTAAAAATGGGATCAGA	CDK17	5128
AATCTAATGCTGGACAAAGA	AKT3	10000
AATCTAATTGACGTCCGTAG	TANC1	85461
AATCTATCCCAGAATCTAGC	LACE1	246269
AATCTCACTAGCCCTAAAAG	ANKHD1-EIF4EBP3	404734
AATCTCTCTACAAGCCGACA	CDK19	23097
AATCTGCTCATTGACCAGCA	PRKACA	5566
AATCTGTACGAACCATCTGG	MLH1	4292
AATCTGTCTAAAACCAGACA	UBA3	9039
AATCTGTGACTGGTCAAACA	MYL12B	103910
AATCTGTTACATAGGGCCGT	KMT2C	58508
AATCTTAACAACTTACCAAG	HUWE1	10075
AATCTTCATCTCCATCATCT	ERCC6-PGBD3	101243544
AATCTTGAGACAGCGTCCAG	TAF1	6872
AATGAACTGGCTAGCCACTT	EXOSC8	11340
AATGAACTGGGATTCCGACG	SETD2	29072
AATGAAGAGTACAACCTCAG	JAK2	3717
AATGAAGCTTAAAGGGCACA	WDR48	57599
AATGACAGCCCATATCAAGG	UBE2D3	7323
AATGACAGTCCCTATCAGGG	UBE2D2	7322
AATGACAGTCCTTACCAAGG	UBE2D4	51619
AATGACCACTTTCTCTACTG	ARHGAP35	2909
AATGACCTACATCACGGAAA	PTPN3	5774
AATGAGGACTCTAAACATTG	EZH2	2146
AATGAGGAGGACTGTAGAAG	NUDT21	11051
AATGATGAACTTCTTCCCCA	GTF2H5	404672
AATGATTAAGGAGTGTGACA	OSBPL1A	114876
AATGATTACACTAACCGTGG	KDM2A	22992
AATGCAAAAGCAAGATTGAG	ZFP14	57677
AATGCACTTTATCGCTACCG	SMYD5	10322
AATGCATTTGAACCATCCTG	CCNT1	904
AATGCCAGAGTTGCACACAA	ZNF397	84307
AATGCCCAGCCCTTACTACA	GINS2	51659
AATGCGATTGTGCATATGGG	TIAL1	7073
AATGCTCCTATATTAACACT	MMS22L	253714
AATGCTGCCAAAGATATGAA	RBMY1E	378950
AATGCTGCCATGGATGCTAG	GLI1	2735
AATGCTGCGAAAGATATGAA	RBMY1F	159163
AATGCTTTAAGCGAACTTTC	IMPACT	55364
AATGGCAGAATTTGGCTGTT	RPS23	6228
AATGGCGAGACTACCACCCA	ALDOA	226
AATGGCTGAATTAAAAGCCA	CCNA2	890
AATGGGCAAAGTGTATCGAC	ATP2A2	488
AATGGGCTTTAGTAGAAGCC	BIRC3	330
AATGGTGATCTTGGATAAGC	DAZ3	57054
AATGTAACCATCAAAGCCTG	RASAL2	9462
AATGTACTCATCAATGCTCT	MAP2K6	5608
AATGTAGAGTATATTCAGCG	KDM2A	22992
AATGTAGTATCTAAACAGCC	SNAP23	8773
AATGTATACACACCTTATAT	FBXW7	55294
AATGTCATTGTGACCTACAA	SMYD2	56950
AATGTCCTTAATACCCACTC	PRMT9	90826
AATGTCCTTATCAACAAGGA	MAP2K3	5606
AATGTCTGGATCTTGGTAGA	RASAL2	9462
AATGTGACCGATTTCACCAG	MYH9	4627
AATGTGACTGCTGACAAAGA	SOD1	6647
AATGTGCTGCACATAACCCT	MTF1	4520
AATGTGCTTATCACTCGTGA	CDK9	1025
AATGTGTAGGTACTACAGTG	DSC3	1825
AATGTTACCACCTTGCAAGA	ERCC6L	54821
AATGTTGAAGATCTTTCAGG	ABCE1	6059
AATTAAATACATCTGCAGTC	ERCC8	1161
AATTAAGAGTGGATGCATCA	OSER1	51526
AATTAAGTGACTTACCGTAA	RGPD1	400966
AATTAATTCGTGTAAAGCAG	ERCC6L2	375748
AATTACTACTTGCTTCCTGT	KRAS	3845
AATTACTGAATACCAACATG	ASUN	55726
AATTAGTGCGGAATAAGAGT	ATRX	546
AATTATCTGAGAAAGACCAG	RGPD3	653489
AATTATCTGATGGTTTCTAA	ZNF729	100287226
AATTATCTTATGTCTTCTAA	ZNF729	100287226
AATTATGGCAGGTTGTTACG	BRCA2	675
AATTCAGCCAATCAGATTGC	VWA9	81556
AATTCCCAGAGATCTAGGCG	FAT1	2195
AATTCCGGTGTGGGTACCCT	AMD1	262
AATTCCTCAGTGATTTCTGA	ZNF396	252884
AATTCTACAAATGATTCTAG	DHX29	54505
AATTCTCACCTGTCGACAGG	CASP2	835
AATTCTCATTAATTTAACTG	MYBL1	4603
AATTCTGCTGATCATCTGGT	CSNK1A1L	122011
AATTCTTGCAGCAAGCGTAG	UTY	7404
AATTGACCCAACGATGAACC	CYB5R4	51167
AATTGACGAAGACCAACAGT	DGKD	8527
AATTGAGAAATCATTGCAAG	KMT5B	51111
AATTGAGAGCTGGTTCATGT	STAT2	6773
AATTGATGATGCCCTGCACT	SOD1	6647
AATTGCGATGTTCAAAGGAA	C2orf76	130355
AATTGCTCTCCTTCTAGATG	MDM2	4193
AATTGTGGTCACATATCGGA	TAF9	6880
AATTTAAAACCTATAGGCTC	MAPK8	5599
AATTTAACATCTTCGAACTG	MAU2	23383
AATTTAAGAACAGATGAACA	RASA1	5921
AATTTACGCAAGAAACAAGG	DET1	55070
AATTTAGAGGTACTGGCGCA	CCNT2	905
AATTTCAGAGGATGAGCGCA	C1GALT1C1	29071
AATTTCTCCATCCTGAGTCA	YAP1	10413
AATTTGATAAGATGGACGTG	MCM6	4175
AATTTGTGAAGCCGATCGAG	CSE1L	1434
ACAAAAATAGAGTACGAAGT	TCEA1	6917
ACAAAAGATCCATCTCGAGT	GTF2B	2959
ACAAAAGATGATAGTGTGGG	TRAF6	7189
ACAAAAGGACCCCAGCATGC	TDGF1	6997
ACAAAATCACCATGCTGGAT	SIRT4	23409
ACAAACAACATCGACCCAGT	GNB1	2782
ACAAACAACCGAATAAGCAG	RPRD2	23248
ACAAACTAGTAAGTTGCTCT	CDKN2C	1031
ACAAACTCGTCTACTTCAGG	CCNA1	8900
ACAAACTCTAGGTCCTGGCA	SDHA	6389
ACAAAGAAAGGCTAGATCAT	SETMAR	6419
ACAAAGAGAGAACTAGCCAC	ERCC6L2	375748
ACAAAGGATCCAGATAATGG	ERCC4	2072
ACAAAGTCAACTTTGCTACG	GTF2F1	2962
ACAAATCTGTACAGATGATG	SERPINB4	6318
ACAAATGATTAAGTTGACAC	BRAF	673
ACAAATGCTCCAATCTGACT	HSPA9	3313
ACAAATTGATAATATAGGAG	AKT3	10000
ACAACAAAGATTCCAAAAGG	DSG3	1830
ACAACAAAGTCTTGATGTGG	TAP2	6891
ACAACAAATCCAAAACAGAA	LEKR1	389170
ACAACAACAGGCATGCAACC	KAT7	11143
ACAACAACATGGATTGACGT	DAPK1	1612
ACAACACAAAAAAAGCAGAC	TAS2R4	50832
ACAACACAAACAGTCCCAAG	ITCH	83737
ACAACACCTACATTCTAGCA	SETD5	55209
ACAACAGAGAAGTTGCCAAG	RPA1	6117
ACAACAGAGCGTTGACACTA	ZSCAN30	100101467
ACAACGTTGGTGATTTGGTG	WHSC1	7468
ACAACTATCTTACAAAGCAC	CDC73	79577
ACAACTTGATATGGAACAGG	CTDSPL2	51496
ACAACTTGTAGACGACGCTA	KNTC1	9735
ACAAGAAATACCGTGCCCTG	RPS8	6202
ACAAGATGATCGACTTGTCC	CDIPT	10423
ACAAGGATGTCTCGTATCTC	RFWD2	64326
ACAAGGGTGAGGACTAAGTG	MED13	9969
ACAAGTGCAATTATTACCAA	UFM1	51569
ACAAGTGTTATCTCTGTACC	LYRM4	57128
ACAAGTTCAGCCCAAGAAAA	UBE2E2	7325
ACAATCAGCACCTTTAATTG	ATRX	546
ACAATCCCTACATTTCGTGG	ARHGAP29	9411
ACAATCGGTCCAATACCCCA	GTF2H4	2968
ACAATCTGAAAACTCGTGAG	GNB1	2782
ACAATCTGGATCGACTCCAC	VPS25	84313
ACAATCTTAAAAGGCGGACA	RFC4	5984
ACAATGACTCGGAGCCACCC	SGF29	112869
ACAATTATGATCAGTTGGTG	CSNK2A3	283106
ACAATTCACAAAGCCAAATG	INPPL1	3636
ACACAAAATCTTATATTGTG	CHST9	83539
ACACAAATACCAGTCCAGCA	TTR	7276
ACACAATCTGGCTAATAAGG	TUBA1B	10376
ACACAATCTTCAAAAAGATT	GAREM1	64762
ACACACAGGACAAATCCAGG	PIAS2	9063
ACACACCATCCGCAACATTG	GAREM1	64762
ACACACGCACCCGCAACTGG	CCND3	896
ACACAGCCCCCGATCTCGGG	SCRIB	23513
ACACCAAAGAGTGCCTGGAG	MED10	84246
ACACCAAGGACAAATAACAT	ASUN	55726
ACACCAAGGAGAATCTGGAG	LIMK2	3985
ACACCACCTTTGAGAGCGCG	SIRT6	51548
ACACCAGAGCCGTGTACCTG	SETD4	54093
ACACCCAGACCAGTGGACAT	CASP9	842
ACACGCTCACCATAGGCGCG	FZD8	8325
ACACGGCTCCATCCACGATG	MED12	9968
ACACGGTGTATGCTGTGAAG	IRAK1	3654
ACACTAAAGGACAGCAGTGC	CABS1	85438
ACACTCACTATTTGCCATCC	DPP9	91039
ACACTCACTCGGGATATGCG	UBE4B	10277
ACACTCGGACCGTCATTGCC	SNRNP25	79622
ACACTGAATGGTCCCAACCG	NCAPD2	9918
ACACTGCCAGAAAAAACTGA	SMYD1	150572
ACACTGGAACATATCAAGAC	MED30	90390
ACACTGGAGTGGTGTACTAG	OGG1	4968
ACACTTTACACGAAAAACAT	WHSC1L1	54904
ACACTTTGTACGGCAGCCGT	UFM1	51569
ACAGAAAATTACCTCCGGAG	CABLES1	91768
ACAGAAATCTGGCACCCAAA	UBE2G1	7326
ACAGAACAAGATGCTAAAAA	PTEN	5728
ACAGAACTCAACAAATGCTG	SNAP23	8773
ACAGAACTGTACAACTCGTG	IL6ST	3572
ACAGAAGGCAATTGCAGCTA	ZWINT	11130
ACAGAAGTCAGGATGTGCAC	EZH2	2146
ACAGAATTCTGGGTACTCGG	DUSP4	1846
ACAGAATTGATACTAACTGG	FBXW7	55294
ACAGAATTGTGTGACCTCGC	TMOD3	29766
ACAGACAAGGGTGCTGAACC	CARD16	114769
ACAGACACAGGGCTTTCAGG	KDM8	79831
ACAGACCACACCTGTCCCAG	TADA2B	93624
ACAGACGCTTTGCATATGGC	RHOBTB1	9886
ACAGAGACTGAAGAGGACTC	NEBL	10529
ACAGATAAGACAGAATCGGG	RFC4	5984
ACAGATATAACTGCATCGAC	UFSP2	55325
ACAGATATCACAGAAACCAC	BRDT	676
ACAGATCATACCTTGGCAAG	BRD2	6046
ACAGATCGAGAACATTGATG	ACTN4	81
ACAGATTCAGGAGTTCAAAG	MYL12A	10627
ACAGATTCTGCGATAATGTG	GTF2A2	2958
ACAGATTGGGGAAAGTAGAT	SMN1	6606
ACAGCAACCTGGGTTCCTAA	SEPHS2	22928
ACAGCAAGAACTGCTTCGGC	YAP1	10413
ACAGCAAGCCAGTGAACCTG	RAC2	5880
ACAGCACACCGTACCGACAG	RPS8	6202
ACAGCACCATAAGCCACCCG	UBE3B	89910
ACAGCAGACATGACTGAACT	JMJD1C	221037
ACAGCCAGAAAGAGTACTCG	C10orf12	26148
ACAGCCAGGAAAGGTTCTCT	UBA2	10054
ACAGCCAGGAGAAGGCCAAG	TSR2	90121
ACAGCCATAGATTTGGACAC	DSG4	147409
ACAGCCATTAAAAACCAGTG	RTF1	23168
ACAGCGAGCCTTCTAAACGT	AKAP2	11217
ACAGCGAGTATGTGATGTCG	CHRNA3	1136
ACAGCGCCTAACTGAATACA	OSBPL1A	114876
ACAGCTGCTCGGTCAGAGAG	CCNA1	8900
ACAGCTTCTCTGAACAAACC	SMAD2	4087
ACAGGAACAGGAATATTACC	SUV39H1	6839
ACAGGAACAGTTAATAGTGT	TAOK1	57551
ACAGGAACTTCATTATCCAC	CDK10	8558
ACAGGAGCTTGTACTCCACC	GTF2A1	2957
ACAGGCACACTGTCCCCGAA	UBE2I	7329
ACAGGCCGTACCAGTCTACA	POLR1B	84172
ACAGGCTGCTGAAATCCCTG	NCOA6	23054
ACAGGGATCGGCTGAATACA	GTF2H1	2965
ACAGGGCAGGTATACGCCTT	SETD4	54093
ACAGGGTCCCCAACTACCGG	SNAI3	333929
ACAGGTATGGGCGTTCGAAA	CASP7	840
ACAGGTCCTTCACACAGTAA	PBRM1	55193
ACAGGTTGCCCCACGCGTTG	FOXO1	2308
ACAGTAACATGGAGCTGCAG	BAX	581
ACAGTACAAGATATTGAGCA	TAS2R4	50832
ACAGTACCTATATCCTCTAG	RBMY1D	378949
ACAGTACCTCTTGGCGCTGG	UBE2E1	7324
ACAGTAGAGGCATATTCTGG	TAF7	6879
ACAGTCACTTTCCATGGGCA	UBOX5	22888
ACAGTCCTGGCAATAGACAA	DSC3	1825
ACAGTCGCAAGCCAAATGTT	UBA6	55236
ACAGTCGGTACATATTCCGA	CDC42	998
ACAGTGATCACACTCCATGT	TGFBR2	7048
ACAGTGCATAAAGCAGTACA	SLC35A1	10559
ACAGTGCGATGTATGATGTA	TAF13	6884
ACAGTGGAGAGGACCAACTC	KIRREL	55243
ACAGTGGTAGGTATCTCAGG	BRD2	6046
ACAGTGTGGAGACTGTACAG	ERCC8	1161
ACAGTTACATGCTACAGGTG	SUPT7L	9913
ACAGTTGAACCCTCTCGTGG	RPA1	6117
ACAGTTTAGACTACAATGAG	ACE2	59272
ACATAAAAATCCTTGGCAAG	MCM6	4175
ACATAACTGCCCTTAAACAG	CDC73	79577
ACATAACTGGTGACACGTAT	DSG4	147409
ACATAAGATAATTCATACTG	ZNF729	100287226
ACATAAGGTAATTCATACTA	ZNF729	100287226
ACATAATCCAGAAAGCGGCG	ZNF397	84307
ACATAATGTAGAAACAGTCC	LIAS	11019
ACATACATAGAATGCCTATG	CDKL5	6792
ACATACCCAGCCAAAGCCAA	RPN2	6185
ACATACCTGCAGTAATTCCA	TCEA1	6917
ACATACCTGCCCATCCACCA	PPP2CA	5515
ACATACCTTTAATCTCCAGA	LCMT1	51451
ACATACTACCTTATTCAGCT	ANAPC4	29945
ACATAGACGGATCTCAATGG	CDK17	5128
ACATATTGGACAATTCTGTC	RCHY1	25898
ACATCATACGCTACACACGA	TCF7L2	6934
ACATCATCAATACAACAATC	TRAPPC13	80006
ACATCATCCGGAATATTGCC	BID	637
ACATCATTGAGTGTCTGCAT	MSH2	4436
ACATCCAACAGGCCACCGGA	LACE1	246269
ACATCCAGAAGACCCATGAG	SGF29	112869
ACATCCGTCCCATTACTACG	RPA1	6117
ACATCGACTGCTGGACAATG	MED12	9968
ACATCGAGGCGTTCATGGCG	TCF7L1	83439
ACATCTGACTCCGATTCTAG	WHSC1L1	54904
ACATCTGGTTTAGAAATGGA	ZFP14	57677
ACATGAGGATATACTTCCTT	CAND1	55832
ACATGATGCAGGACTACGTG	CARM1	10498
ACATGATGGACGCATTGCAC	PRMT8	56341
ACATGCACAAACTTGTATGG	SYT4	6860
ACATGCTCTTGGCACACCAG	BBX	56987
ACATGCTGGTGAACAAGATG	FBXW7	55294
ACATGGACAAGCACCCTGGG	CDK14	5218
ACATGGAGTTGCGGTAAGTG	PRMT1	3276
ACATGGCAAAAAACTTGTGA	PNPLA4	8228
ACATGTCTACATTTATTAGG	PICALM	8301
ACATTAAAAAGATGTGGCAT	NARS	4677
ACATTAACTGGCTTGTTCAA	CASP6	839
ACATTAGTGGGACATACAGG	FBXW7	55294
ACATTCAAATGTATCTATCA	SLC35A1	10559
ACATTCGGGTGAAATAATGG	UBE2I	7329
ACATTGAATCAAAGGATCAC	NSUN7	79730
ACATTGCATTCATAATGGAC	DHDDS	79947
ACATTGCTGCAATACTCCAA	MED21	9412
ACATTGGATGTTGCACGCTG	MYL12B	103910
ACATTGTCGGTGAATAGTGA	COG3	83548
ACATTTGCAAGGATTATCCG	SMC1B	27127
ACCAAACCCATTCCAAAGAA	SRP14	6727
ACCAAATGAAAAGCAAACCT	CASP8	841
ACCAACACTGTGTTGTACCA	TAF5L	27097
ACCAACAGCCGGGTCACGGT	SMARCE1	6605
ACCAACGTATCCTTTATCAG	EXOSC8	11340
ACCAAGAATACTCACATGTG	MAP2K4	6416
ACCAAGACCTACATAAGAGA	AXIN2	8313
ACCAAGCTATACAGCCGACA	FGF13	2258
ACCAAGGCCTGTCGGTCACG	CCND3	896
ACCAATACACTCTTATATGG	DHX29	54505
ACCAATACTCGGTCAAAGAG	HSPE1	3336
ACCACAAAGAGCCATACCAA	PIAS3	10401
ACCACAGATAAAGTCAAACA	PTPN11	5781
ACCACAGGTAAAGCTCCTGT	AGFG1	3267
ACCACCAGAAATCCTACCAG	CTIF	9811
ACCACCCAGCCTATCAGGAC	BBX	56987
ACCACCGCTCTCGGTTCCGG	IKBKB	3551
ACCACCTTCCCCTCGATCCA	ZNF217	7764
ACCACGATATCGGACAGTGT	TAF8	129685
ACCACGTTTACCGGACACAC	GNB1	2782
ACCACTAGCTTTCCAAACGG	KIT	3815
ACCACTCACTTGGTTACACT	KLHL13	90293
ACCACTCTCTCTACGCATAG	BRD2	6046
ACCACTGGATTAGCAGACCC	CBWD3	445571
ACCACTGGGTGGTCAATCCG	BMP7	655
ACCAGAATTTGTAGACTGCG	XIAP	331
ACCAGACGAGCGATTAGAAG	PRDM2	7799
ACCAGAGCAAGTTATCAAAG	MED28	80306
ACCAGATGTGGACAATCACT	TAF6	6878
ACCAGCACACAAAGATACTC	ZNF217	7764
ACCAGCAGAAGGTTAACCGG	LATS2	26524
ACCAGCCTTTCAGAATGGCA	NQO1	1728
ACCAGCGGGCAGTCGTCGCC	ANAPC11	51529
ACCAGCTAATCAAGTAAAGA	CDK14	5218
ACCAGCTTGAATTTCCTCAG	RAB6A	5870
ACCAGGAGGATGATCCGCCG	PGD	5226
ACCAGGCTGCCAGTCATGCG	KAT5	10524
ACCAGGTACCTTATATGAAG	UBE2W	55284
ACCAGGTATCAAGCTCATAG	KAT7	11143
ACCATAAAATTCTGCTGTAG	EZH2	2146
ACCATACGCAGTAGTCATCG	PRMT7	54496
ACCATCCAGAGCGCCAAGCT	FGF11	2256
ACCATCGGAAGACGATGGGA	TARDBP	23435
ACCATCTTACCACTCTTCCA	METTL14	57721
ACCATGCCGAAGTCCGTCGT	EHMT1	79813
ACCATGTCCGAGGACTCCGC	SOX9	6662
ACCATTCTCAGGGAACATTG	EZH1	2145
ACCATTGCCCAACCTCCGCG	ERBB3	2065
ACCATTGGGGTCGATGCGGT	PAF1	54623
ACCCAAACATCGACGAAAAG	UBE2L3	7332
ACCCAAAGCGCTAATTCACA	MAP3K7	6885
ACCCAAATTATAGTCATGAC	ABCA6	23460
ACCCACCCTGAGTCGCATGA	BAP1	8314
ACCCACTGCCAGAAAGACAA	RNF214	257160
ACCCAGACCCAAGCGTGCCA	C16orf92	146378
ACCCAGACTACATCCATGGG	ERCC1	2067
ACCCAGGTGCCCTTCATGTG	RBMY1A1	5940
ACCCAGTCCAGAGTCCTATG	ABCA6	23460
ACCCATAGCCTCCCTCGGAG	KDM4B	23030
ACCCATCATTACTCCCACTC	PLEKHA1	59338
ACCCATGGACGTTCGCCAGT	RPA2	6118
ACCCATTAAACGTACCTGGG	MED23	9439
ACCCCACCACCAATCTGCAG	PRMT2	3275
ACCCCACCGCCAGATCGTGC	MAP2K3	5606
ACCCCATCTAGTTCCAAGAG	TXNRD1	7296
ACCCCCTTCTCCTTACTCAA	FBXO2	26232
ACCCCGAGCGGCACCAACAG	RBX1	9978
ACCCCGGCCAGGAGTCATCC	FOSL1	8061
ACCCCTCCCAGACTCCGACG	SETD1B	23067
ACCCGAATGTGTACCCTTCG	UBE2I	7329
ACCCGGAAGTAATGAGTGTG	BIRC3	330
ACCCGGAGCAGTACAGCGCG	FOXC2	2303
ACCCGGCGTGGTATGTACAT	NEDD4L	23327
ACCCGTGATTGAAGCCGGCG	KDM4B	23030
ACCCGTTGCTCTATCTTCGT	SETBP1	26040
ACCCTCCACCAGCATAAGCT	DDB2	1643
ACCCTCGGCCCGACATCACG	FGFRL1	53834
ACCCTTATACACAACTCCAT	CDK1	983
ACCGACTCGATGTAGATGAG	JARID2	3720
ACCGAGTTTCCGTAGTAGGG	GATA3	2625
ACCGCCGCCCCAGCGTGACG	PAWR	5074
ACCGCCTCCGCCTATTACAG	CDC23	8697
ACCGCGACCGGAGCCGCGAC	CDKN1C	1028
ACCGGAATCTCGATGAACAC	EXOSC8	11340
ACCGGAGGGAAGCACCTCTG	SFMBT1	51460
ACCGGATATCAAAGTCTGTC	CSNK2A2	1459
ACCGGATTATATATCACCTG	ROCK2	9475
ACCGGCAGGTTTCCTACCCG	SHROOM3	57619
ACCGGGGAAGTTTCTCAACT	SIRT5	23408
ACCGTCAATATGTTTCCTGA	KDM6A	7403
ACCGTGCATTATAACATGGG	SDHA	6389
ACCTACAGGAGTACCTGACG	TGFBR2	7048
ACCTACCCTTGTAATTGAGG	STAT2	6773
ACCTACCGTGCAGGACCAGA	RALGAPA1	253959
ACCTACTGAACCCTCCTCCG	SOCS3	9021
ACCTAGCCAGTGATGGACCA	GAREM1	64762
ACCTCAGGTCTTCATATACC	UBE2C	11065
ACCTCATAGAATCGGCAGTG	ERCC2	2068
ACCTCCAGACATCCGAACCA	SRSF1	6426
ACCTCGCGGATGGTGGAGAG	CDK6	1021
ACCTCGGGATGAATGAGAAG	FGF9	2254
ACCTCGGTACGAAACCACAC	KAT2B	8850
ACCTCTGATCCATTGTGTTG	MTF1	4520
ACCTGAAGAAAATCTCTATG	DBR1	51163
ACCTGAGCTATAGAGGCCTG	ABCG2	9429
ACCTGATCGCAACAAATAGT	PARK2	5071
ACCTGCAGGATATTCGACGT	DOLPP1	57171
ACCTGCTACCAAACAGTGCT	ERCC8	1161
ACCTGCTGAACAGTATCTTC	FBXO11	80204
ACCTGGAGCACAATGCACGT	HDAC3	8841
ACCTGGGATGAAACTAACTG	TPR	7175
ACCTGTAGACTGTACTGACG	GSS	2937
ACCTGTCACGTCTGGCACGT	FLNA	2316
ACCTGTGAAAATCTGGGGCA	BPY2B	442867
ACCTGTGCAAGACAAGGCAT	COBL	23242
ACCTGTTTGGGACAAACCAC	IMPACT	55364
ACCTTAACCATTGCAAACCA	NF1	4763
ACCTTGACAGACACACAGGT	BRCC3	79184
ACCTTGTGGCTCTGTCTGTA	BCL2L11	10018
ACCTTTCCAGAACACACAAG	CABYR	26256
ACCTTTGCTCCAGTATGTGC	CCNC	892
ACGAATTATGGCTTCCAATG	KDM5D	8284
ACGACAGATGCTGCCCGCAT	MED8	112950
ACGACATGCTTCATACAACT	CDC16	8881
ACGACCCCAAGTACTGGCGA	KMT2B	9757
ACGAGACAGCAAAACATCGC	KCTD5	54442
ACGAGAGCAGCGCGGAGCGG	UBE2G2	7327
ACGAGAGCTCTTCTCATACC	LUC7L3	51747
ACGAGAGTCCTCATATGAGG	OGG1	4968
ACGAGCCAAAACTGATCCCG	TGIF1	7050
ACGAGTGTGCATACTTCGAG	MSRB1	51734
ACGAGTTTATGTGCCCATGT	BTRC	8945
ACGATAAAAGCCATGTTGAG	TCEB1	6921
ACGATGAAAAGCTACTTTGG	WDR20	91833
ACGATGACTCAAGATTTGAG	TPR	7175
ACGCACGTTCAAGTGTGACA	DET1	55070
ACGCATGCGTGCCATCCTAG	CCNB2	9133
ACGCCATGCGGTACATAAAT	NCBP2	22916
ACGCCCGGGTCGGTACCTTG	WDR20	91833
ACGCCGGTCTTGATGACGAG	STAT3	6774
ACGCGCCTGACACTGGCCGC	ZNF785	146540
ACGCTGCACAGTGACGACGA	AIP	9049
ACGCTGTGGAATTCCATAGT	RACK1	10399
ACGCTTCATCAATGTTGGGA	UBE2H	7328
ACGGAGCTGACTTCGCCAAG	ALDOA	226
ACGGAGTCAACCGTTTCGGG	CDKN2B	1030
ACGGATGGATAAGAGTCCAG	HERC2	8924
ACGGATTAAGCCACAGCCCG	CELF4	56853
ACGGCAGCGACTTTCAGCAC	JAGN1	84522
ACGGCCCTCACGATAATCAA	SETD4	54093
ACGGCCGTCATGCTTAGAGA	SNX19	399979
ACGGCTCCTTCAGTTGTCCC	AMOTL2	51421
ACGGCTCGCTTAACCTGTCG	CCNK	8812
ACGGGACAATCTTGGCATGT	RCOR1	23186
ACGGGCTGAAGCGAGCCCTC	RAD52	5893
ACGGGGTGAAACCATGTCGT	NO_CURRENT_5	NO_CURRENT_5
ACGGTGAAGAAATCGTTTGG	ERCC6-PGBD3	101243544
ACGTACCTTAAGATCAAAGT	DAPK1	1612
ACGTAGCCAGCACTAATGAG	ERCC5	2073
ACGTAGCCATTGTCACAGCG	LZTR1	8216
ACGTCAACTGCTGGAGTGGG	NO_CURRENT_6	NO_CURRENT_6
ACGTGAAAATGCTACAGTTA	CARD16	114769
ACGTGAGGCCCCCGCGACCA	TAP2	6891
ACGTGCACTCACCTGTACGG	TAF4	6874
ACGTGGACATGATGACGGCT	C8orf4	56892
ACGTTATATGACCCAATGAA	NEDD4	4734
ACGTTATTATAAACAACACT	CUL3	8452
ACGTTCACCCGTCACTAGTG	HDAC5	10014
ACTAAAACGCTTAATGACAG	NUDT21	11051
ACTAAACTGTACATCATGCA	PIK3C2A	5286
ACTAAATACACATATACCCC	KRIT1	889
ACTAACAGAAATGCTTAACG	KMT2A	4297
ACTAACATGTATGAAGGTGT	PFDN1	5201
ACTAACCTGATCGTAGAGTG	DUSP1	1843
ACTAAGGGCCGAAGATAACG	PCNA	5111
ACTAATGGGACATGAGTACA	CDC23	8697
ACTAATTTAGGATCAACCAC	BRAF	673
ACTACAATGAGTTGGAAACC	PAF1	54623
ACTACACTATTCTTCAGGTA	TADA1	117143
ACTACAGCTGTGGAAACCTG	TUBA1B	10376
ACTACCCAATGCCTCAACCG	MLH1	4292
ACTACCCGCACGTGTACCCT	TRAPPC12	51112
ACTACCTACCGGGCCCATGA	UBE2D4	51619
ACTACCTGCTGGGCATCAAG	FGF4	2249
ACTACTACCACAATCACCAG	NUP62CL	54830
ACTACTTACCAATGGCCCTG	RUVBL1	8607
ACTAGAATGACCAGTCAACA	HPRT1	3251
ACTAGAGACACACATACTGG	ASH1L	55870
ACTAGAGTCATGATCAGCGA	NO_CURRENT_7	NO_CURRENT_7
ACTAGATCACGCCAGTCTGG	ERCC6-PGBD3	101243544
ACTAGCCAAAAGTTCTTCTG	KLF8	11279
ACTAGCCTGTTCGCGAGTAG	NO_CURRENT_8	NO_CURRENT_8
ACTAGGGCAGTGTGTCTGCA	NO_CURRENT_9	NO_CURRENT_9
ACTAGGGTTTGAATTTCTAC	LYRM4	57128
ACTAGTTGACAATTTAGCAG	UBE2E2	7325
ACTATCTTGAGGAATAGTGG	HERC4	26091
ACTATGCTTGGTACTCCGTA	KIAA0907	22889
ACTATTAAGACCATGTTGGA	SKP1	6500
ACTCACACCAAAGTCAACTG	MAP4K4	9448
ACTCACAGGTTGCGGTCGAA	TCF7	6932
ACTCACCACAAAGTTCCGGA	PPIL2	23759
ACTCACCCGAGTGCTCGCCG	SOX9	6662
ACTCACCGAGGCTTTGCACA	DDA1	79016
ACTCACCTGATGGCAGCAGT	OSER1	51526
ACTCACGCTCGCAGTAGGTG	CELF4	56853
ACTCACTAGTGTGCTCGTCA	MYBL1	4603
ACTCACTCGCCCCAAAGATG	SNAI2	6591
ACTCAGACCACATTATCCAC	METAP1	23173
ACTCAGCCATTTTATTAGAA	NO_CURRENT_10	NO_CURRENT_10
ACTCATCCACCGCGGCACCT	CARM1	10498
ACTCATGAAGGCAATGAGCT	LHFPL2	10184
ACTCCAAACTCCATTCCCAA	MYH9	4627
ACTCCAAGAATAACTTGATG	G6PC2	57818
ACTCCACACGCAGCTCCCAG	ZNF747	65988
ACTCCAGTTACTATGATGAC	BRD9	65980
ACTCCCACAATGTCAACACC	ACTN4	81
ACTCCCATTATAGGTCTGTG	CCND2	894
ACTCCGCCAGTGACTCCAGG	HDAC10	83933
ACTCCGGTTTGATGAACTCA	FAM49B	51571
ACTCCTCCTCCAGCTCGTAG	MED22	6837
ACTCCTGAAATGATAAATCA	BRCA1	672
ACTCCTTGCTTGTTCCCGTG	ABHD3	171586
ACTCGAGAATATTCGAAGGG	UBE2J2	118424
ACTCGCATATTGTTAGAGAA	KRIT1	889
ACTCGGAGGTACCGCCCGCG	PHLPP1	23239
ACTCGGCCCCTACACCCAGG	MAU2	23383
ACTCGTCATCAATCCCGTCT	HDAC1	3065
ACTCTCCCACCATTCCATCT	INTS9	55756
ACTCTCCCAGCGAGACCCGT	MID1	4281
ACTCTCCCATCAATTGAATG	HNRNPA2B1	3181
ACTCTCCGCCTTGCCCATGA	TCEB3B	51224
ACTCTCCTTCATCAGTCACG	KNTC1	9735
ACTCTGAAAAGTGATCCTCT	ANKHD1-EIF4EBP3	404734
ACTCTGAAGATGATCAGACA	RPL30	6156
ACTCTGTCTTCATCTAAAAT	AK6	26288
ACTCTGTGATGATGTAAATG	PDGFRA	5156
ACTGAAAGCTAAATTACTGC	CDKL3	51265
ACTGAAATCTGTAAGCAGGT	SBDS	51119
ACTGAACCAACACTTAACCG	TAF9	6880
ACTGACTGTTGACCTTCTCG	GRK5	2869
ACTGAGATGGCGGATGAAGG	TSG101	7251
ACTGAGCCGGGATGCCGTGA	NOSIP	51070
ACTGAGCTACTACTCTGAGT	TXNRD1	7296
ACTGATATAGGCACTCCAGG	INTS9	55756
ACTGATGTCATATGTGATAG	ERH	2079
ACTGATTACGAGATACAATG	ERCC6	2074
ACTGCAGGCATTAATGCCGA	SP3	6670
ACTGCAGTGGAAGGGCAGAG	MSTO1	55154
ACTGCAGTGGTAAAGATACC	TAF12	6883
ACTGCCAAATACACCATGGA	USP6NL	9712
ACTGCCTATAGAAGTGACAA	MPDZ	8777
ACTGCGGTCATAAGCACCAG	WWP2	11060
ACTGCGTACCTGCGCAAAGC	INO80C	125476
ACTGCTAAGGTCCACAACGT	LUC7L3	51747
ACTGCTTTGATCTCTTGCCA	HTT	3064
ACTGGAAGCACGAATGACAG	NFKB1	4790
ACTGGAATTTCGCTCTGGAG	CASP2	835
ACTGGCAAGCCACTATTATG	UBE2D1	7321
ACTGGCACCAGAAAACTCAA	TDP1	55775
ACTGGCTGATCGGGAAAGCG	LHFPL2	10184
ACTGGGACGAGGTGCGTACG	MAP2K6	5608
ACTGGTACAACTTCAGGGAC	BRD9	65980
ACTGGTCAGTATTAGAGGTG	FGF20	26281
ACTGGTCTGAAGGTTAGCGA	PRMT9	90826
ACTGGTGTCCATCACTACAG	RPL30	6156
ACTGTAACTTAGGAATACTG	SNX19	399979
ACTGTACTTGCTCGTGAAAC	GTF2H2	2966
ACTGTAGTATCAGTCAGTCC	RPS6	6194
ACTGTATCTAAGGATGCCCC	BRD8	10902
ACTGTCAACGAAACCTGGCA	LIMK2	3985
ACTGTCACTAACCTACTGGT	CIC	23152
ACTGTCAGGTTGCTGATACG	SETD2	29072
ACTGTCGGCGTGGCACACAA	SFMBT1	51460
ACTGTCTCTGGTAGAGATGG	MAP2K1	5604
ACTGTCTTTAGATGCACATG	OSER1	51526
ACTGTGGAGGAATTGCGTCT	TIAL1	7073
ACTGTGGCGTGATGGCCGCG	GAPDH	2597
ACTGTGGGACTCGCTCACAG	SETBP1	26040
ACTGTGTAAAAGATTTGTGC	TAF2	6873
ACTGTTACTGGTGTTGATAC	PPP6C	5537
ACTGTTGGGAGCTAACGGCT	ZEB2	9839
ACTGTTGTCCCACCAACTTG	RASAL2	9462
ACTGTTTGGCCTTCACATGT	BRCC3	79184
ACTTAAAGCGCAAACACAAG	UBE2O	63893
ACTTAAGCTCCTCATACACA	ANAPC1	64682
ACTTAATTCTGAGTATTCCA	NEK9	91754
ACTTACAAAGATCCATAATG	RBX1	9978
ACTTACAACTCCTGTCCGGA	UBE3C	9690
ACTTACAATTAAGGTAATTT	MED31	51003
ACTTACAGGTCCCATAATTG	UBE2D3	7323
ACTTACATGGGGTCGTCATC	BIRC5	332
ACTTACCTCAGACCCGATTT	ORAOV1	220064
ACTTACGAGCCGGGCTTCGT	POLR2I	5438
ACTTACGGCCTTCATTGTAG	CCNF	899
ACTTACTAAAGTGTATCTGG	UBE2G1	7326
ACTTACTCAAAAACTTCTAA	MED10	84246
ACTTACTCCAAGCTCATGTG	TMEM260	54916
ACTTAGCGTCCAGTGACTCC	ERCC5	2073
ACTTATACGACTCAGAACCT	EHMT1	79813
ACTTCAAATGTACCATGATG	MED17	9440
ACTTCACAAAAGATGTGTAG	CFL2	1073
ACTTCAGCATCATGCAGCAG	GTF2F1	2962
ACTTCCAGTGTCAAGCTGCG	DSG3	1830
ACTTCCATTTAGGCAACCAG	HERC4	26091
ACTTCTACACTATAAAAAGC	TAS2R31	259290
ACTTCTCACCAAACATGGTC	MYL12B	103910
ACTTCTCGACTTGTATGTCC	GTF2H2C	728340
ACTTCTGATTGGCGACTCAG	RAB1A	5861
ACTTGAAGTCAGCAAATGAG	PTPN3	5774
ACTTGAGCGTGTCTGGCCAC	FZD1	8321
ACTTGATCGAGAAACCCCGG	FAT1	2195
ACTTGGATAAAAGCACTGGG	DAAM1	23002
ACTTGGATGATTGTCACCGG	YPEL3	83719
ACTTGGATGTGGCTAATGCG	RUVBL1	8607
ACTTGGCACTGACACCACTC	SUFU	51684
ACTTGGGAGTGATGATTCCA	STAT2	6773
ACTTGGTATAAAAGAACCGC	CCNL2	81669
ACTTGTCAGCCACCATGTAG	PPP2R1A	5518
ACTTGTCTCATGAACATGAT	ANAPC1	64682
ACTTTACAGAAATCCAAAAC	KLHL9	55958
ACTTTACTACATGAGTATGT	CCNT1	904
ACTTTAGAACCTGACTTTCG	ASUN	55726
ACTTTCGATAGCACATGTGA	TCEB1	6921
ACTTTCTTATCGCCAGCAGG	CCNT1	904
ACTTTGCTGAGCATCCCGCC	UBE4A	9354
ACTTTGGAACAGGACCAACT	MAP2K1	5604
ACTTTGGCAGAATCTAGCTA	RALGAPA1	253959
ACTTTGTTTGAAAGTCCGAA	STX17	55014
AGAAAAACGAGATATTGCCA	CTR9	9646
AGAAAAATTGCACTATGAAT	CCNG2	901
AGAAAACGATCAAACCCCAC	JAK2	3717
AGAAAACTCCAAATTAAGGA	NAMPT	10135
AGAAAAGCACAGTTCCAGTG	UGDH	7358
AGAAAAGCATGGGTACAACA	RCOR1	23186
AGAAAATCCTGATCCCAGAT	KAT2B	8850
AGAAAATTAAAAAGAACCAG	UBE2Q1	55585
AGAAAATTAGGAAGACTCAA	UBE2Q2	92912
AGAAACCAGAAGGTACCCTG	FBXW8	26259
AGAAACCAGCGCCTCCGTGG	PARP1	142
AGAAACCCCATATAGCAATG	ZNF521	25925
AGAAACCTACAACTCATGGA	BRCA1	672
AGAAACTGAACTATCCTACT	NO_CURRENT_11	NO_CURRENT_11
AGAAACTTCAGCCAACTGTG	MAPK9	5601
AGAAAGATGAAGACCTCTTC	BANF1	8815
AGAAAGCAACCCAAAGTGGG	ERCC4	2072
AGAAAGCTGGGACAACTCTG	FLCN	201163
AGAAAGGACGTCGATCGAGG	KMT2A	4297
AGAAAGGAGTCTTTGGACAG	CDC42	998
AGAAAGTAGTGAGTGACGTT	SIRT3	23410
AGAAAGTGTGTGACCCCGAG	PPAN	56342
AGAAATACCAGATTATACCA	KLHL23	151230
AGAAATATCCGACATAGGAG	GCLC	2729
AGAAATCACATAGTAACCTA	GHR	2690
AGAAATCAGTCCCCAGAATG	MLH1	4292
AGAAATCATCGTTACAGACA	UBA1	7317
AGAAATGAAGAAAACAACAG	PDGFRA	5156
AGAAATTAAGAACGACAATT	CBWD3	445571
AGAAATTTATCAGTACCTTA	CCNA1	8900
AGAACAAGAAACTGGCAGAG	RNF40	9810
AGAACAAGGCCAGCCCCGCG	TAF10	6881
AGAACAAGGGCATGCCCAGT	CDKN2B	1030
AGAACACCAACTCTGCCCTT	BAP1	8314
AGAACACCAGAAAAATCCTC	SYTL4	94121
AGAACACGAGACCAATGGTG	STAT1	6772
AGAACAGGATGGTAGTGCAA	DET1	55070
AGAACAGTCCAGCCCCGCAG	MUS81	80198
AGAACCACAACTGTCAACAT	EXOSC8	11340
AGAACGTTCGTGGTTCCGTG	TGFBR1	7046
AGAACGTTGACGAAGCACGA	DPH2	1802
AGAACTCAACAAAAATCCAG	UBE2G1	7326
AGAACTGGAATGACGATACA	C18orf32	497661
AGAACTGTGCAGCAATCACA	UBE3B	89910
AGAACTTAAGCGAGGCCCTG	TADA1	117143
AGAACTTAGTAGATGCATTG	TANGO6	79613
AGAACTTGAAGGGCAAGTTG	GTF2A2	2958
AGAAGAAAAAAATGTCTACG	NO_CURRENT_12	NO_CURRENT_12
AGAAGAAAGTGAAGAATGTG	SUPT16H	11198
AGAAGAAGTTTCCAAAAATC	CAB39	51719
AGAAGAATTTGCTAAAAGAG	URM1	81605
AGAAGACACACTCAATCAAG	CUL1	8454
AGAAGACCAAAATTTACAGG	ASUN	55726
AGAAGAGAGAGCAACCTACT	SPRED2	200734
AGAAGAGTGTACTGTCGCAT	RBX1	9978
AGAAGATCGTGTTTGTAACG	ITPA	3704
AGAAGATGATGAAACACCCG	PIK3C2A	5286
AGAAGATGCACTTCACCATA	CDY1B	253175
AGAAGATTGCCACGCAGCAG	MNT	4335
AGAAGCAGATGAGAACGAGG	DDRGK1	65992
AGAAGCAGCCAGTTCGCAGG	MOCOS	55034
AGAAGCCTCCCCCATACCTG	UBE2L6	9246
AGAAGCGCTCCGAATTGGAG	SMAD3	4088
AGAAGCTATTACCATCTGAA	CTR9	9646
AGAAGCTGGATTCCATACTG	RAD51	5888
AGAAGGCGTACACTGGCACG	PML	5371
AGAAGGGACCTCTCTTCGAG	MCM6	4175
AGAAGGGAGTAGCTGGACTT	RNF146	81847
AGAAGGGATGACTTACGTGA	ZNF827	152485
AGAAGTATGGACCTCATCTG	CCNE2	9134
AGAAGTCGAACGGAGTCTGG	SMYD3	64754
AGAAGTCGTCGCCGGCCTGG	BCL2	596
AGAAGTGGAGGAGCTCGCCG	PDRG1	81572
AGAAGTGGGTCAACAGCTGT	PPM1A	5494
AGAAGTGTCTTCCTGGACTG	METAP1	23173
AGAAGTTAGACTACTACTGG	SLC14A2	8170
AGAAGTTGTTACATACTGTG	ARID2	196528
AGAAGTTTAATCTGCCTCCA	FGF1	2246
AGAATAAGTCATGCTCTGAG	RASAL2	9462
AGAATACAAACATCTTGTCC	LZTR1	8216
AGAATACATAAGTAGCCGCA	RAD52	5893
AGAATACGCTTGATCCAAAG	SMURF2	64750
AGAATATGTGGGCCTCGCTA	CDK13	8621
AGAATCACTAAAGGCATTCT	FANCL	55120
AGAATCAGACTCATGCCAAG	MAPK8	5599
AGAATCCACATCATTCACAA	XPA	7507
AGAATCCTTACCTTCATAAG	UBE2J2	118424
AGAATGAAGCCTCCATGGCG	SUPT5H	6829
AGAATGCACTCACCTTGTCA	NBN	4683
AGAATGGCCACAAAACTCTG	TANGO6	79613
AGAATGGGGCTGGATAGGGG	LCMT1	51451
AGAATGTGACTACTTCGGGA	FARP2	9855
AGAATTCTATACTCTCCACG	ICE2	79664
AGAATTGCTGAAGCAGTAAC	SUV39H2	79723
AGAATTTATTCCCATCAGTG	SEC23IP	11196
AGAATTTCTCCAACTCCATT	STX17	55014
AGACAAATCTCGGACTTGAT	UBR5	51366
AGACAAGCCACAATTAACAT	EIF2S3	1968
AGACAATCACGTCAAAACCC	CASP7	840
AGACAATCATTCCAAAATTT	SEC11A	23478
AGACAATCCCATTAATTGCT	SAR1A	56681
AGACAATGGCACCGGGATCA	MLH1	4292
AGACAATTCAGTAAGCACAG	CDH2	1000
AGACACCCTGTACTTCTTCG	JMJD8	339123
AGACACCTCACAGAGTGGGG	BRD7	29117
AGACACTGCGATTCAAACAG	AIFM1	9131
AGACACTTACCGAAAATGGC	XRCC1	7515
AGACACTTATACTATGAAAG	MDM2	4193
AGACAGAATGATCCGATGAG	ERCC6	2074
AGACAGGGGAAATATGTCTG	UBE2F	140739
AGACAGTGAAGTCAGCCAGG	CNOT3	4849
AGACATTCATAGAATGAACA	GTF2H3	2967
AGACCAAGAATCCCATGATG	DSG1	1828
AGACCAAGCCAACTGCAGAT	FGFBP1	9982
AGACCACCAGCATCGACATG	CDK10	8558
AGACCATATCAAAGTGACCC	CBL	867
AGACCATGATGTCTATCACA	BRD8	10902
AGACCCAAACGCTCTTATCT	CIAO1	9391
AGACCCCGTAGGCAGGACGT	NO_CURRENT_13	NO_CURRENT_13
AGACCCCTTACGAGAGATCG	PLCG1	5335
AGACCCGAGATGTTTATCAT	WNT5B	81029
AGACCGCCTACAGCGCCGGG	RNF40	9810
AGACCGGGCAGCTTTGTACG	PRMT8	56341
AGACCTCACTTCCTATGACG	PML	5371
AGACCTCAGGCTGTCCACAG	SMUG1	23583
AGACCTGAAGTTGGACCTCG	KDM8	79831
AGACGACATCTTTACCGCCC	HSPG2	3339
AGACGACCACCACGACACTG	GATA1	2623
AGACGAGTATGAGACATCAG	TDP1	55775
AGACGGGCATAGATCACATG	SMAD4	4089
AGACGGTGCCGAAGGACCTG	SUPT4H1	6827
AGACGTTGAAGAAACGAAAG	PAF1	54623
AGACTAGGAAGGCCACAGCG	DOLPP1	57171
AGACTATAGAATCTAACTGG	FBXW11	23291
AGACTATATCACTCTTGGAG	ERCC4	2072
AGACTCAGTCTCTCAGAGGT	DDX56	54606
AGACTCCAATTCATATATCA	CDKN3	1033
AGACTGACCGGCGCAGACGG	CHD7	55636
AGACTGTGTAGACCAGTTCC	CHCHD4	131474
AGACTGTTAAAATTTGATGC	ARHGAP29	9411
AGACTTCATCAAGAAGCTTG	PSMA4	5685
AGACTTCGGGCTGTGCAAGG	AKT1	207
AGACTTCTGGCAAGATAAGA	SAV1	60485
AGACTTGAAGCGAATACCCA	SUPT16H	11198
AGACTTGCAAATACATGAAG	CHST9	83539
AGAGAAAAGGCTAAAACCCG	LUZP1	7798
AGAGAACATGCATTAACATC	TCEB1	6921
AGAGACAAATTGCTTGTTAA	UBE2F	140739
AGAGACATGCTGGACGCCCT	DUSP4	1846
AGAGACCAGCCCGCTGACCG	CCND2	894
AGAGACCATGGATTCAATTG	GTF2A1L	11036
AGAGACCGAATAGGCACAGG	SMURF2	64750
AGAGACCGCCTTCACCCACG	WNT5B	81029
AGAGACCTTGAGAGTCATGA	MED7	9443
AGAGAGAGACTGTGAAGACC	SYT4	6860
AGAGAGAGCATGTCCTGAAC	RNF138	51444
AGAGAGCATCGTTAAAGATA	TRAF3	7187
AGAGAGCTCTGCTGACGGAG	RNF146	81847
AGAGAGGGAGCACTGTGACA	BRD9	65980
AGAGAGGGTTGTCATGCCGC	RUNX1	861
AGAGAGTAATAGATGAGACA	NUP133	55746
AGAGAGTAATGCTGAACTTA	RPL17	6139
AGAGAGTGATCACTCCAACA	MEP1B	4225
AGAGATATTTGAAGTTGATG	SKP1	6500
AGAGATCACTTCTTTGATAG	NARS	4677
AGAGATCAGAAAGGAAACGT	GNA13	10672
AGAGATCATGAAACACCTGA	VPS45	11311
AGAGATGACTTGGAGTCTCT	CSNK1D	1453
AGAGATGAGCTACATGTCCG	UFL1	23376
AGAGATGATGACTGGCGTAT	C12orf60	144608
AGAGATGGCGACCCGAACTG	HRH2	3274
AGAGATGGCGTCCCAGCCTC	FGFBP2	83888
AGAGCAAGGAAGTGAAGCTG	RNF165	494470
AGAGCACCAGCAGTATCACT	MUS81	80198
AGAGCCAAACGATACTCCGC	KAT7	11143
AGAGCCATCGGAAATTTCCG	SETD1A	9739
AGAGCCCAACAAACACACAA	FZD6	8323
AGAGCCGCAAAAGCGCCAAG	LATS2	26524
AGAGCCTGCTCGCATTGAGG	SCRIB	23513
AGAGCCTTCCATAAAAACGA	FBXO11	80204
AGAGCGAGGCCACGCACCAG	RAD52	5893
AGAGCGCGCTTCTGATCCTG	UBE3D	90025
AGAGCGGCTGATCAAGCATG	EFTUD2	9343
AGAGCGTGCAGATAATGACA	PTEN	5728
AGAGCGTTGCGGATAATGCA	JMJD7	100137047
AGAGCTCGAGAGACACATGG	ARHGEF7	8874
AGAGCTGCTCTTCAGCAGCA	SEC31A	22872
AGAGCTGGAACACGAAGACC	EMP1	2012
AGAGCTGTTTGACAAAGTGG	CHEK2	11200
AGAGCTTCAAGGATACCCAA	DOCK5	80005
AGAGGAAACTGTGACTATGC	ZNF396	252884
AGAGGAAAGGAATGTCCCAT	CCNG1	900
AGAGGAATTACTACCACTCA	C18orf54	162681
AGAGGAGCAAGAAAAAGTAG	FGFR1OP	11116
AGAGGAGTACAGTGCAATGA	KRAS	3845
AGAGGAGTCCCATCACATGT	RNF40	9810
AGAGGCAGCTGTTGTTTCGG	IKBKB	3551
AGAGGCATTGAAGGCCGATG	TICAM1	148022
AGAGGCCACGAACATGCAAG	CCND1	595
AGAGGCCGAAGCCGTACACG	RCC1	1104
AGAGGCCTGGCAGAACGAAG	BTRC	8945
AGAGGCTCGGTGGACGTACC	ELP6	54859
AGAGGCTGAGGCACAGAGAA	ZG16	653808
AGAGGGGGACTACAACGTCA	CSNK1D	1453
AGAGGGTACGGCTGTCGAGC	BMP7	655
AGAGGTCCATCTTCAAGAAG	RBMY1J	378951
AGAGTACCGTGAGAAGATAG	YWHAB	7529
AGAGTACCTTTCACTGCGCG	HDAC10	83933
AGAGTCCAGTGGTCATTCAG	TAF6L	10629
AGAGTCGACCAACCCCAATG	SMARCC2	6601
AGAGTCTGAAGAATTGACAG	PTPRA	5786
AGAGTGAACAAAAAATCCCC	TANC1	85461
AGAGTGACTGGCAGTGTCCA	SLPI	6590
AGAGTGAGCAGGCGGCTTTG	TSPY3	728137
AGAGTGCATCGACCCCTCGG	MYC	4609
AGAGTGTCGATCATGAACTC	MED12	9968
AGAGTGTTACCGGACTTAAG	YARS	8565
AGAGTTGCAGTTGATAGAGG	CDC23	8697
AGAGTTTGAGCCGAGTGAGC	BAD	572
AGATAACACTTGTGCGCGAC	LYRM4	57128
AGATAACAGAAGTACAACCA	ATP2A2	488
AGATAAGTTTCCATGCACTT	ITPA	3704
AGATAATCATACTGATATGA	TBL1XR1	79718
AGATAATCTGACATGCCTGG	CASP10	843
AGATACAAGTATATCACTGG	GTF2A1L	11036
AGATACAGAGATCATGACTT	PFDN1	5201
AGATACCGTGTACTACAAGT	BRD9	65980
AGATACTCCCATCTGATTAG	MED27	9442
AGATATCACACATTACAGTG	RASA2	5922
AGATATTCACCATTATAGGT	KRAS	3845
AGATATTGATACTAGACGCA	CSE1L	1434
AGATCACATCACCAATAACC	PPM1A	5494
AGATCACTATGAAATGAAAG	UBE2Q1	55585
AGATCAGAGCATCGCCTCAG	PWP2	5822
AGATCCTCTAATGCATTATC	NAE1	8883
AGATCCTGGCAGATCCTGTG	TAF6L	10629
AGATCGAATCGGGACATGAT	MCM6	4175
AGATCTAGAACAGCTCAAGT	PEA15	8682
AGATCTCCTCTATGAAATGC	SEC11A	23478
AGATCTCTCAAGATTCAGTA	RNF138	51444
AGATCTGCAAGAGGAAGCCG	RBMY1E	378950
AGATCTGCGAAGACGTTTGT	ITCH	83737
AGATCTGGAAGTTCTTCTTC	CDY1B	253175
AGATCTTATCACTAGAGAGC	RNF214	257160
AGATCTTCAGTATACAAATC	KRIT1	889
AGATCTTGAACCGTCTGTGG	RAD52	5893
AGATGAATCTACCAGCATAG	CCNA1	8900
AGATGAGGAAGAAGACCCCA	TAF13	6884
AGATGATGTCGTTTGATACC	GNA13	10672
AGATGATTCTTTGACTCTGA	CD44	960
AGATGCACTGCTGAGTCAAG	MED8	112950
AGATGCATTTGCCACATTCA	CAB39	51719
AGATGCCATCCTCAATCCGT	LUZP1	7798
AGATGCCTCAACTTGGAGCC	IL6ST	3572
AGATGCTTAAAGCAGTATTT	RBMY1A1	5940
AGATGGAGGACAGATTTCAC	ABHD3	171586
AGATGGCAACATGCCTATCG	DAPK1	1612
AGATGGCTATATTTCCAATG	PPP3R1	5534
AGATGGGATTCCTATCATCT	C18orf8	29919
AGATGGGCTGCACTCACGTG	ERCC6	2074
AGATGGGGCCCTGTATGGAT	FGF21	26291
AGATGTACTCCCGGGCACGC	KEAP1	9817
AGATGTGAGTGGATCTATCG	SETDB1	9869
AGATGTTACTGATGCAATGG	ACE2	59272
AGATGTTCTCACACCTACGG	PRKACA	5566
AGATGTTGTCCTGACACTTG	SLPI	6590
AGATTATCAAGAATGATCTG	TSPYL2	64061
AGATTCATTCACGAGTTGGG	NO_CURRENT_14	NO_CURRENT_14
AGATTCCCAATGTAGAACGG	KDM5C	8242
AGATTGGAAGTGGTGCAACA	CIC	23152
AGATTTAACATTTCTGCTAG	SYCP1	6847
AGCAAACCACCTAGTCCCTG	ZBTB7B	51043
AGCAAAGAGGAAATATTCAG	CTDSPL2	51496
AGCAAATCTTCTAATCCATG	PIK3CA	5290
AGCAAATGCCCAGCACACCA	SMARCE1	6605
AGCAACACTAGGTTTAGGTG	NRIP1	8204
AGCAACATGAGATTGAATCC	STAT2	6773
AGCAACCTAAACGAAGAGGT	ARHGAP21	57584
AGCAAGAATGCAGCCCAACA	PRKCI	5584
AGCAAGACGAAGCTATTACC	JMJD6	23210
AGCAAGATCTCAGTCAGAGT	ANAPC10	10393
AGCAATGATGACTACTGATG	CCT4	10575
AGCAATGCCAAGATCTGTTG	CCNH	902
AGCACACCCAGCAATACGAA	NF1	4763
AGCACACCTTGCACTCGAGC	NHLRC1	378884
AGCACAGTAGAACTAAGGGT	BRCA2	675
AGCACATCAGAAAGAACTAG	SUPT16H	11198
AGCACATGGATGTATCCATG	ITGB8	3696
AGCACCAGGCTCCTCCAAGT	HDAC5	10014
AGCACGGCAGCGCTTGTAGT	RBM14-RBM4	100526737
AGCACTTCAGGAGAGCTTAT	SMC1B	27127
AGCACTTGCTAACTCTCTTG	XIAP	331
AGCAGAAACTGCTTCATGGC	GTF2H5	404672
AGCAGAGGGACATTGACGGT	WIF1	11197
AGCAGATGCGGATCATCCAC	GNA13	10672
AGCAGCCCCAGCAAGAACCG	FGF14	2259
AGCAGCCTGAGCATTTACTC	COPS5	10987
AGCAGCCTGTCCAACAGTCA	FOXJ3	22887
AGCAGCTACGATAAGAACCA	HERC2	8924
AGCAGCTGCACGAACCCCAT	RBM14	10432
AGCAGGAAACTGGATTGTCG	TAF4B	6875
AGCAGTACCTGGATGACTGT	CDK16	5127
AGCAGTCCGAGACATCGAGG	SMYD3	64754
AGCAGTCTCCTGGCAATCTC	CDKN2C	1031
AGCAGTGCAGCAAAATAACC	UBA1	7317
AGCATATAAGTGGTCAAACA	MED27	9442
AGCATCAACAACCTGTACCC	DAPK1	1612
AGCATCACTGAAGACCTCTG	ARHGAP21	57584
AGCATCCTTACAGTAAGTCA	ATM	472
AGCATGAGCATATCGAGCGT	ARHGAP35	2909
AGCATGCAGAATTTCTTACG	PPME1	51400
AGCATGCTGCCAAGACTGGA	ERCC6	2074
AGCATGTGGTACTTACTGGG	CUL4B	8450
AGCATTAAAGGACTGACTGA	SOD1	6647
AGCATTGCTACCTTACGCTG	UBR5	51366
AGCCAATACAGACAGTGGTG	GLI1	2735
AGCCACAACAAGCTGGACAA	PEA15	8682
AGCCACACCACAGTGGGCGT	E2F1	1869
AGCCACCCAGAGAACCCGCA	TERF2	7014
AGCCACTGAGCAATACCACC	SMYD5	10322
AGCCAGATTTCAGCGCATGA	NUDT21	11051
AGCCAGCAAATAGCACTTGC	POLR2J3	548644
AGCCAGCTGCTGTGAAATAA	CDKN3	1033
AGCCAGGACACAATAGTCAG	CCNE1	898
AGCCAGGACACGTGCAGGAC	BPY2C	442868
AGCCATAGCACTCAGTGCGC	PPP5C	5536
AGCCATCCTCTTGAGCGAGA	SAV1	60485
AGCCATGAGTGAGAATAAAA	INO80C	125476
AGCCATGGGAAACATCGCAC	SETD3	84193
AGCCCAAGTGTATTAAGTAG	GGPS1	9453
AGCCCACTCGCAGTACTATG	AMOTL2	51421
AGCCCAGCGCCGAGAGACTG	FGF3	2248
AGCCCAGGAGGTGAAAGAAA	SYS1	90196
AGCCCATACCATCCAGTCTT	CBFB	865
AGCCCATAGTCAATCATCAG	FAT1	2195
AGCCCCAACAAGTCTGACTG	TSG101	7251
AGCCCCTCACGTTAATCCTG	FZR1	51343
AGCCCGACAACTTCCTCATG	CSNK1E	1454
AGCCCGCCACAGAATAGCTG	NO_CURRENT_15	NO_CURRENT_15
AGCCCGGTTAAGGAAAACCC	ROCK2	9475
AGCCGAGTCGTATCAAGGAG	CASP10	843
AGCCGATCTTCTTGCCGACG	CSNK1G2	1455
AGCCGCTGATGCCCTACATG	SMARCE1	6605
AGCCGGCATTGACATAATAG	AXIN1	8312
AGCCGGGAAAACCGCAGACG	CCNI2	645121
AGCCGGGATTTGTAGGTGAG	RHOBTB2	23221
AGCCGGGCTCATTGTGATAG	UBE2Z	65264
AGCCGGTTAATGCCCAAGCC	TSPY3	728137
AGCCTCTATGTGGCCATGAA	FGF12	2257
AGCCTCTTGCTGACGTCCTG	CDK18	5129
AGCCTCTTGTCGGTATGAGT	MTM1	4534
AGCCTGGCTTGGTCTGAGTC	C16orf92	146378
AGCCTGGGGTGGACAGCGAT	GATA3	2625
AGCCTGTCATATGCCAGTGA	EMP1	2012
AGCGAACTGGACACACATAC	SNAI2	6591
AGCGACACACAGTTCTACCC	MED16	10025
AGCGAGGCAAGTCGTACCTG	ACO2	50
AGCGATTGTTCAATTAGGGT	VWA9	81556
AGCGCAAGATGTTGCTGGCT	TAOK2	9344
AGCGCACGTTGACCGAACCT	DUSP4	1846
AGCGCATGCAGGACTGCCAG	ARL2	402
AGCGCCGGCAAAAAAGTGTG	EZH1	2145
AGCGCGGTCTATCTAAGTGG	KAT6B	23522
AGCGGACCCAAGCTTGAAGA	PPP5C	5536
AGCGGACGTAGACTCATACA	CCDC68	80323
AGCGGCATTCTCGGATCACG	ERCC3	2071
AGCGGCGATACATTTCATAA	TAF11	6882
AGCGGCGCGGGGTCGTGACA	FGFBP3	143282
AGCGGCGGGAGGAGGCCCAG	TSPY1	7258
AGCGGGAATTGGGATTAACG	PTCH1	5727
AGCGGGTCATGGCCAACGTG	TWIST1	7291
AGCGTCCGACTCGACTCGGA	UBE2F	140739
AGCGTGCCACACCAGGACAT	UBE2L6	9246
AGCGTGCCTGGCGTTCCTCG	CBFB	865
AGCTAAAGTGAGATTCGTCG	SGK223	157285
AGCTACCCGAAAGGGTATAG	CDY2B	203611
AGCTACCTGTATTTAAACAT	DHX29	54505
AGCTAGAAATAGTTGTACTC	ATM	472
AGCTAGCTACTCCTAATGGT	UFSP2	55325
AGCTAGGCATGATTGACCGC	PARP1	142
AGCTATCTAGAACAACTCAA	VPS45	11311
AGCTATGCGCCCCATCATGT	SEPHS2	22928
AGCTATTCAAGGTTGAGCAG	TANC1	85461
AGCTATTTCTCTCTCCACTG	KDM4C	23081
AGCTCAAAGGGATTGTGACA	FGF12	2257
AGCTCACCAGATTACTGATG	SNAP23	8773
AGCTCAGGCTCCAAGTCGGG	RNF7	9616
AGCTCAGTGCGGAAAGCGTG	FGF1	2246
AGCTCATAAAACTCCAAAAG	MOB4	25843
AGCTCCAAATAGTAACTCGG	CDK7	1022
AGCTCCATACATAGGACGGC	FBXO4	26272
AGCTCCATCGCCGCGATAAT	NO_CURRENT_16	NO_CURRENT_16
AGCTCCCAAAGAGCAACAGA	TAF6	6878
AGCTCCGCAACAAGATAGCA	RPS17	6218
AGCTCGAGCCGCCGTACGGG	MED26	9441
AGCTCGGGTGTACCATTGCA	ST3GAL5	8869
AGCTCTAAAGGATCGCCGCA	CREBBP	1387
AGCTCTCCACGTCAACGGGA	PRMT7	54496
AGCTCTCCATACAAGCATGA	BRD8	10902
AGCTCTTCTCTAATTGTGGG	MID1	4281
AGCTGAACATAAGGCCACAA	ROCK2	9475
AGCTGAACCCCTAGGCAACG	SHROOM3	57619
AGCTGACAACCTGATCAATG	NARS	4677
AGCTGAGGCAGTACCAGAAG	CHMP6	79643
AGCTGAGTGTCGCTTAAAGA	CCNB3	85417
AGCTGATGAACAGGAAGTTG	VPS45	11311
AGCTGCAAGCATGTCAGTGG	WHSC1	7468
AGCTGCAGCAGTAACACATG	NUDT21	11051
AGCTGCGACGCAGACGACGA	LCMT1	51451
AGCTGCTGCCCAAATTCAAG	GTF2H1	2965
AGCTGGACTCTGTAGAAATC	NO_CURRENT_17	NO_CURRENT_17
AGCTGGAGCTGGGCAACGAG	DUSP6	1848
AGCTGGCAGACCACAAACTG	PTEN	5728
AGCTGGCCACGAAATACGAG	FAM49B	51571
AGCTGGCGTCGGGATCGATG	MLST8	64223
AGCTGGTGACCATGTCGGTG	MAFG	4097
AGCTGTGGCAGCGTCAACAG	MET	4233
AGCTGTTAGACCCTTCCACG	SLC39A6	25800
AGCTGTTGTTAAGAAAGCAC	NSUN7	79730
AGCTTCAAGCCCTACTCCAA	ZNF703	80139
AGCTTCGGCGAGATCGCCAG	LHFPL2	10184
AGCTTCGTCAGCAATTGAAG	UBE2Q2	92912
AGCTTGAATCCAAAAACATG	TRIP12	9320
AGCTTGACGTTGTTGAAGAG	VPS25	84313
AGCTTGGCCCGCTTGCGGCG	STK11	6794
AGCTTGTTTACATAATCCGC	CUL5	8065
AGCTTTAGAAGTGGAACGAC	MNAT1	4331
AGCTTTAGCTCTAGGCGTGT	CDC26	246184
AGCTTTCCGAACCAGGCCTA	KMT5C	84787
AGCTTTGATCCAATGATGTG	HDAC9	9734
AGGAAACTCCGAAGTCTATG	CMTR2	55783
AGGAACAAACATTCCTCATT	FGF1	2246
AGGAACACTTACTTTGACCA	CDH2	1000
AGGAACTACTACGAACAATG	HNRNPA2B1	3181
AGGAAGAAGAGCCTATTAGT	UBE2Q2	92912
AGGAAGCCAGTTACTCATCA	TAP2	6891
AGGAAGCCGAGCTCATGTCA	MPDZ	8777
AGGAATTGAATGATCTGGCA	UBE2D2	7322
AGGACACAGGAAAGCCAAAG	TAF15	8148
AGGACACGCAGCGATCTAGG	HDAC6	10013
AGGACAGCTGGGTCTCCAAG	SUPT4H1	6827
AGGACATGATGACCAACTCT	MAP4K4	9448
AGGACGACGACATGGCAGTA	ARID2	196528
AGGACGGCGATCCATCGTCA	AXIN1	8312
AGGACGGGGATTGCGTCAAC	MVK	4598
AGGACTCGAGCCTTCCGATG	TRAPPC12	51112
AGGACTGACCCACCTCATCT	SMYD1	150572
AGGACTTCGGGTGTTTGACA	MYL6	4637
AGGAGAAAAGAAACCAGGAA	LUC7L2	51631
AGGAGAAAAGATCATCACTG	TXNRD1	7296
AGGAGAACTCGAGTTTGACG	PRKACA	5566
AGGAGAAGAAACGCGCTGGG	SIRT2	22933
AGGAGAAGATGCCCGGTGCG	BCL2	596
AGGAGACTCAGAACCAGTCG	RPRD2	23248
AGGAGAGAAGCAGATTCCAG	BRD7	29117
AGGAGAGTTTAGAATAACGC	RALGAPB	57148
AGGAGATCAACCAAAATAGG	SUPT20H	55578
AGGAGATGTTGACTTGGGTG	HTR3E	285242
AGGAGATTACGATGAAACGC	FARP2	9855
AGGAGCACCAAACCGATGGG	SP3	6670
AGGAGCAGACTTACGCACTG	ANKHD1-EIF4EBP3	404734
AGGAGCGAATGGGCATGGCA	WDR61	80349
AGGAGCTCTTGCATTATTAG	ARID2	196528
AGGAGCTGAACTCTGTAATG	MED23	9439
AGGAGCTTAACGGTCTGACT	LIAS	11019
AGGAGGAGGGCCTCGTGGAG	TSPY4	728395
AGGAGGATCCCTCTGCAAGT	UBE2D4	51619
AGGAGGCGGCACAGTATGAC	SAE1	10055
AGGAGGGACCTGTGACGTCC	RNF165	494470
AGGAGGTACTCTCCAATCAG	CHRNA3	1136
AGGAGGTGACGTGTCTGGCA	ANAPC4	29945
AGGAGTACATCAAGACGGGA	IRAK1	3654
AGGAGTCACCCATATCACCG	PLCL1	5334
AGGAGTCTTCAGTAATGGCT	CCAR1	55749
AGGAGTGTTATGAAAAGGCT	NO_CURRENT_18	NO_CURRENT_18
AGGAGTTCAAACACTGACTG	MAP3K1	4214
AGGAGTTGCAGATGGGACTT	CCND2	894
AGGAGTTGTCGGAATAACCA	PBRM1	55193
AGGATAGAGTTCCTTGGCGA	SIRT2	22933
AGGATCTACGCATAAGCCGA	SMYD4	114826
AGGATCTGTCTATGAAGGAG	UBE2E2	7325
AGGATGAATCGGAACCACAG	CASP10	843
AGGATGTAATCAGACGACAC	APC	324
AGGATGTCGGTAGATTACAA	PLCL1	5334
AGGATGTCGTAGGTCACACT	KAT5	10524
AGGATTAACTAGAACACTAG	BIRC3	330
AGGATTCATAGAGAGTGCCT	KDM6A	7403
AGGATTTGACTCAGCCATCG	HDAC10	83933
AGGCAACAGGACATCCTTCA	UBE2J1	51465
AGGCAAGTCTAATCTCACAG	BRD7	29117
AGGCACATCCTGAATGATCT	UBOX5	22888
AGGCACCTGAAGAGGACCAG	ZEB1	6935
AGGCACTTATGTCTGACCGC	TRIP12	9320
AGGCAGCCATCAAAAGGGTA	TAF11	6882
AGGCAGCTATACTGCAGGAC	FGF9	2254
AGGCAGTCATCAACGAATCG	FARP2	9855
AGGCAGTTGACTTTCTCGGT	NEBL	10529
AGGCATATGAACTGAACATG	WHSC1L1	54904
AGGCATTGGGATAGGCTCTG	FGF23	8074
AGGCATTGGTGAACACCACC	BARD1	580
AGGCCAACATGCGAAAACGC	GCLC	2729
AGGCCAACTCACTGTAGCCC	VPS18	57617
AGGCCAAGAACAGGGAGACA	CDK3	1018
AGGCCAGGCCTACCTGACGT	MED15	51586
AGGCCATATACGACTAACGA	C18orf32	497661
AGGCCCAGCAAAAATTCATC	CUL5	8065
AGGCCGACATTAAGGAAGCA	LBR	3930
AGGCCGCGTACCTTTGTGGT	JMJD8	339123
AGGCCGTGGCTCAAGAACTG	ARFIP1	27236
AGGCCTAGTTGACACTGCAA	CCNI	10983
AGGCCTCAGATGAAGAACAC	LEO1	123169
AGGCCTGCTTAGCAAGTGCG	HDAC5	10014
AGGCCTTTACAACATTGGCA	CHUK	1147
AGGCGACGACCCCAGAAACG	PARK2	5071
AGGCGATAGTGGGTAATACG	TCF7L2	6934
AGGCGCACCGTGAGGAGGTA	TERF2	7014
AGGCGCCAGAGGGGTCCTTG	FOXA1	3169
AGGCGGCAAACTTCACATGA	DBR1	51163
AGGCGGCAGTAGATGACATG	SMAD3	4088
AGGCGGGATCAGTCGCGTCG	SPRED2	200734
AGGCGGGGGTTCGTGACACA	CSNK2A3	283106
AGGCGTCCCCCTACAGACGC	KDM4A	9682
AGGCGTTATGAAGAGCACCT	RALGAPA1	253959
AGGCTATGCAGCTTGCAAAG	NFKB1	4790
AGGCTCAGGATATTAGGGGC	RGPD8	727851
AGGCTCAGGATATTAGTGGC	RGPD5	84220
AGGCTGACACATTAAAGGAG	CSNK1G3	1456
AGGCTGCGGCAGGGTTTCTG	TSPY3	728137
AGGCTGGCATAACTGTATGG	FOXJ3	22887
AGGCTGGCGTGTTGAAATGG	PPM1A	5494
AGGCTGGGTTTAGTTGACTT	C18orf8	29919
AGGCTGGTGCCATTCTCACC	MAFG	4097
AGGCTGTGCTGTCAGACGAT	AXL	558
AGGCTGTTTGGTGCGCAAAG	CDC73	79577
AGGCTTGGAGTACACACCAA	PAPOLG	64895
AGGCTTGGTATGATGCGCAC	RBM12	10137
AGGCTTGTCGTCAAAACGCA	CSNK1D	1453
AGGGAACTAATGAACCTCAC	TSG101	7251
AGGGACACTACTTATAGCAG	KIAA0907	22889
AGGGACTCAAACTCAGCCCA	CBLC	23624
AGGGACTCAATGACACAATG	CCNF	899
AGGGACTGGAGAAGGCTACG	MYO9B	4650
AGGGAGACACCGGCGCCACG	ZNF703	80139
AGGGAGCCATGGATTTGCTG	TCEA2	6919
AGGGATGGCTCATTGAACGA	MYBL1	4603
AGGGCAACCAGAACACACCA	PLCL1	5334
AGGGCACCGCTGCACCCGAG	FLNA	2316
AGGGCAGGTCCGGATACGTA	GLI3	2737
AGGGCATGCTTACCACCCAG	ERCC3	2071
AGGGCCATGAATCCACTGTG	CIAO1	9391
AGGGCCCAGGCAAGCAGGTG	ZNF747	65988
AGGGCCGACCGAATGCGTGG	NR5A2	2494
AGGGCCTTTATGCTGCCCTA	TBL1XR1	79718
AGGGCTTTCAGGATTAGACG	UGGT1	56886
AGGGGACTCGGAGACTGCGA	CASP8	841
AGGGGATACTCACAGTTGGG	SYVN1	84447
AGGGGCAGGGCTATCTTATG	NO_CURRENT_19	NO_CURRENT_19
AGGGGCTGCAGACACTATGT	TAF5L	27097
AGGGGGTGATCAAGTACATG	MSH2	4436
AGGGGTAGGTGATGAACTTG	PAF1	54623
AGGGGTCTTAATGATCCGCG	KMT2A	4297
AGGGGTGAAATTAGTTCGGA	CTNNA2	1496
AGGGGTGGCGCCTCCATGCG	MNT	4335
AGGGTACCTTTAGGCCAGAA	RAD51	5888
AGGGTACTGAGAACTTGTTG	TSG101	7251
AGGGTATAACTTGAAAGAGG	PPP2R2A	5520
AGGGTCAAATCCATTCCCAA	MSTO1	55154
AGGGTCAGGAACCCAACTAG	UBR5	51366
AGGGTCCTTATAGTGGGCAC	ERBB2	2064
AGGGTCTATTCCATTCATCA	RNF8	9025
AGGGTCTCTTGTTCCGAAGC	MDM2	4193
AGGGTGACGGTGACTTGACT	PEX14	5195
AGGGTTCAGAAAACCCCGAG	CCNT1	904
AGGGTTGTGAGATGTTGTCG	RPRD2	23248
AGGTAAAAGACTGATCAGCG	TAF9	6880
AGGTAAAGCTGGCTTTCGAG	CHEK2	11200
AGGTAACGGTGGTAATGTAG	CDK13	8621
AGGTACAACTGGGCTGAACA	TBPL2	387332
AGGTACCAAGTGCTGCTGGA	ATP6V1E1	529
AGGTACCCTCCGACCCACCA	GATA3	2625
AGGTACTCATTGACCCCAGA	MUS81	80198
AGGTAGAATACAAACAACTG	SEC23IP	11196
AGGTAGAATTTACAACTGAC	TRNT1	51095
AGGTAGACAATTGCAGCCTG	BCL2L11	10018
AGGTAGCTAATGTTGTTGCG	JAGN1	84522
AGGTAGTCACTCACATGTAG	ITPA	3704
AGGTATCATTGAAGGTGCCA	DRG1	4733
AGGTATCCGAAGAGCTATAG	SPRED1	161742
AGGTCAATACTATCTCCAGG	GTF2I	2969
AGGTCATACCAATCATCATG	KMT2A	4297
AGGTCATAGTCATAGGACTT	TXNRD1	7296
AGGTCATCAGTGAAAAACTT	JMJD6	23210
AGGTCCTGGGAACTCCAACA	GSK3B	2932
AGGTCCTTCACAGCCACCAT	TCEB1	6921
AGGTCGTTATGTTAAAGTCT	UTP15	84135
AGGTCTGGACGTTCTTTCAA	SEC23B	10483
AGGTGAGGGAGCGTAAGACA	ZWINT	11130
AGGTGATTCCTCCTAAGGAG	KDM4C	23081
AGGTGCGGGTCCAACAGATG	TBCD	6904
AGGTGCTGCGCGACCCCTCG	FOXQ1	94234
AGGTGCTGGAATATTTACTA	CCDC178	374864
AGGTGGCGAGGGGACTACGG	PLCG1	5335
AGGTGGTGCGCCATGCCCAG	CDK20	23552
AGGTGGTTGCTAAGCGACAG	PARK2	5071
AGGTGTCTTGAGCCCTATGG	UBA7	7318
AGGTTAATCGCCAGCCACAG	GINS2	51659
AGGTTACCTGAAGGAATCGA	CTIF	9811
AGGTTATGTGACTACAATTC	TAF9B	51616
AGGTTATTAAACCATATGAT	TIPRL	261726
AGGTTATTAGACTTCATCGG	SETD5	55209
AGGTTCCCGTGTGTTCCCAT	KAT7	11143
AGGTTCGGAATCCTCATCAG	XPC	7508
AGTAAAATGGACAAGGGACG	MYBL1	4603
AGTAAACCTACAGAAAAATG	NAE1	8883
AGTAAACTGAAGCGTGACGA	UBE2F	140739
AGTAAATATAGATCTTATGC	UFSP2	55325
AGTAACCAAAGAGAAAATCC	NAMPT	10135
AGTAAGCTTTCTATTTGATT	RPRD1B	58490
AGTAAGTATGCTATGTCATG	ADAM18	8749
AGTAATAAACAGAGCCCGTG	PSMA8	143471
AGTAATTTGTAAGCGTTGCA	UBE3D	90025
AGTACACTCTTCTGAAGTAG	RBX1	9978
AGTACAGCTTGGCCCCAAAG	CDK5	1020
AGTACAGTTACCTGGTAAAG	FBXW11	23291
AGTACATCGCAGAGATGGTG	ATP6V1F	9296
AGTACATCTGTATGAACAAG	FGF17	8822
AGTACCGCACGGTACAGACA	UBA7	7318
AGTACCGTGTCACCACGTAA	MAPK9	5601
AGTACCTCGAAGTCCTCGAG	FKBP8	23770
AGTACCTTGCCAGTTCCAGG	RUVBL1	8607
AGTACGACTGCGAACAGCGA	KEAP1	9817
AGTACTATAATGACTTCCCG	SHC1	6464
AGTACTTACCTACAGTTGGG	UBE2E2	7325
AGTAGAAAAGGGCGACAACC	BAX	581
AGTAGAAGTAGACCAAACCA	UTY	7404
AGTAGAGGCCAGCATAGCGG	AP2S1	1175
AGTAGATGGATCAAGAACAA	GTF2H2C	728340
AGTAGTAACAGCAGTGCCGG	CNOT3	4849
AGTAGTTTGGGTGTGATGGA	ORAOV1	220064
AGTATCAATTCCGACATCGA	WNT5A	7474
AGTATGAACATCCAAATCCC	FBXO11	80204
AGTATGAGACTCATAGGGTG	NO_CURRENT_20	NO_CURRENT_20
AGTATGATGACTCTATAGAC	ANAPC4	29945
AGTATGTATTCGAGACTCTG	DAAM1	23002
AGTATGTCCCCTTGCCAAAA	RUVBL1	8607
AGTATGTGTGTTCTAATGCA	NHLRC2	374354
AGTATGTGTTGACTCGGACC	ZG16	653808
AGTATGTTTACCTGGAACCC	MED4	29079
AGTATTGCAGTGAAGTTCAC	XPO6	23214
AGTCAAAGTTGGAACTCTCA	HDAC6	10013
AGTCAACCACCATAGTGAGT	PEA15	8682
AGTCAATCGAGATCTCACTG	MTM1	4534
AGTCACAATCAACTTCAACC	TANC1	85461
AGTCACATGTGGTGGAATGG	CSNK2A1	1457
AGTCACGGACTCCTGCATCG	CASP2	835
AGTCACTGAAATCCATTCGT	MEP1B	4225
AGTCACTTTGCCTGGACAGG	URM1	81605
AGTCAGATGCAGACGCAGTG	HDAC10	83933
AGTCAGCATCCCATCATCGT	RGPD3	653489
AGTCATACCTGAACAACCCA	ROCK1	6093
AGTCCAACAAGGAAGGAACT	UFC1	51506
AGTCCACCATTCATACATCG	WIF1	11197
AGTCCCGCGGCAGGTCCTTG	WNT5A	7474
AGTCCGAAACACCGTCAATG	TICAM1	148022
AGTCCGGCGTGGTCTGCACT	POLR2J3	548644
AGTCCTAAATGCCGACTCAG	TRAPPC12	51112
AGTCCTACTTCCAGTCCAGG	SMAD4	4089
AGTCCTCCAACCGGTTCAGG	NARS	4677
AGTCCTCTCACTCCAGCTCT	CHEK2	11200
AGTCCTGGGCAAGAAGCTGG	BANF1	8815
AGTCGAACTGTCACTGTCCG	BRD4	23476
AGTCGAAGTTCCATCGCTCA	CDKN1A	1026
AGTCGATGTCAGCTTCGGCG	FLNA	2316
AGTCGATTTCAATCTCGTCG	BRD4	23476
AGTCGGGGTTGTAGTCGATG	PPAN-P2RY11	692312
AGTCGTGTCCCGCATGCTCG	SEC13	6396
AGTCTAAGCAAATCACGTGG	PARK2	5071
AGTCTACAAGAGTGGTTCAG	PPME1	51400
AGTCTAGGGCTGGTCAACTG	CAND1	55832
AGTCTGAGGAGTCCACGTAG	SPRED2	200734
AGTCTGCATAGCTATGCTTA	GTF2H2	2966
AGTCTGCCAAATAAGATGGG	KLF8	11279
AGTCTTCCAAAGACAGACTG	CTIF	9811
AGTGAACCTGAAAATGATCA	ZFY	7544
AGTGAAGTCTATGTTTGGGG	NEK9	91754
AGTGAATGTGTTGAATGACA	OSBPL1A	114876
AGTGACCAAGAAGTTTAGAG	MEP1B	4225
AGTGACCCCCATCCGGGCAA	LBR	3930
AGTGACGCCCAGTACCCATC	CSNK1A1L	122011
AGTGATACTTGCCATTTGGA	UBE2A	7319
AGTGATCGATACACTGAAGG	PFDN2	5202
AGTGATGCTGAATTTGACGA	ERCC6	2074
AGTGATTCGAAGCTACTTAG	SETD4	54093
AGTGATTTGCAATAGTATGG	PRMT9	90826
AGTGCAAGGATAGAAACACC	DDX10	1662
AGTGCAAGTATACATGTTGT	MED12	9968
AGTGCAATACAGCCTCATTG	FBXW11	23291
AGTGCAGAACTGCTTCACAA	BTRC	8945
AGTGCAGCCGGGAAAACTCA	PARK2	5071
AGTGCATTGAACACTACCGC	KDM5D	8284
AGTGCCACTTATCCACCAGG	AIP	9049
AGTGCCGGGTTGATGCTGAG	XPC	7508
AGTGCCTGCTATTGACAACT	ADAM18	8749
AGTGCTCATATACAGCACAC	UGDH	7358
AGTGCTGAGTCGCTACCCCC	LUZP1	7798
AGTGCTTCGAGGCACACCAG	PML	5371
AGTGGAAAAAGTGAGACTAA	SEL1L2	80343
AGTGGACATCAACACACAAG	MDC1	9656
AGTGGATCCTAATGAGCAGT	TAF12	6883
AGTGGATGAACAAGTACTGA	GTF2A1	2957
AGTGGATGAGATTTCACCCG	RBM15	64783
AGTGGATGTCGGCGACAGCA	YPEL3	83719
AGTGGCATTCTGCATTTCTG	NQO1	1728
AGTGGCCGGAAGAAGGGCCG	RGPD3	653489
AGTGGCCGTTCATCATGCCC	FOXF1	2294
AGTGGCGTGTGTGAAATCGA	DIP2C	22982
AGTGGCTACAGACGAAGCAA	SYNJ1	8867
AGTGGGAAGCATCATTGTGT	TADA1	117143
AGTGGGCCCTCACGTGAAGG	CELF4	56853
AGTGGTAGCCATGGATGGAT	C8orf4	56892
AGTGGTAGGCTTCTTAATGG	CCNB3	85417
AGTGGTCAATTGCAAAACTT	TAS2R4	50832
AGTGGTCACTGCATCGGCAC	SETMAR	6419
AGTGGTGATAGATTTAGCAA	CDKL2	8999
AGTGGTGGATGGTTACCACT	SPRED1	161742
AGTGGTGGGAACGACAAACA	RPS6	6194
AGTGTATTTGCACACACCCA	RACK1	10399
AGTGTCCTCAGGCTTCTACG	FGF22	27006
AGTGTCTTCGATCTCATTGA	ATP6V1F	9296
AGTGTGACAAGTTCCCCGAG	SFRP1	6422
AGTGTGAGAGTCCCCAATGG	CDK4	1019
AGTGTGGGACACCCGCACCT	FBXW8	26259
AGTGTTGGTGGTGAAAGTGG	NUP62CL	54830
AGTGTTTAGAATCTCCAGTG	CSNK1A1	1452
AGTTAATGGGTGCGTTCACC	MLST8	64223
AGTTAATGTAGCCACAGCAC	CABS1	85438
AGTTAATTTGAATAATATAA	TMOD3	29766
AGTTACCGAAAAGATAGTTC	NPM1	4869
AGTTACTAGTATCCCGCGGG	PARD3	56288
AGTTAGAACTTGTTAGAAAA	ARFIP1	27236
AGTTAGGAAACAGGAACTAA	NSUN7	79730
AGTTATGATTACATGGAAGG	FGF7	2252
AGTTATTCATATACGTCTAG	ARHGAP29	9411
AGTTATTGACACTCAACAGA	PFDN1	5201
AGTTCAACATAGAGAAAGGT	ATP6V1E1	529
AGTTCACAAGGACAATACTT	GEMIN6	79833
AGTTCAGCTTCAGCCCCGAG	ANAPC2	29882
AGTTCCACGAAGCTTGGGAG	GATA1	2623
AGTTCCAGAGGACAAGCTAC	GGPS1	9453
AGTTCGAAGACTCCGGCAGT	AIRE	326
AGTTCTACTACAGACCCCCG	CDKN1B	1027
AGTTCTACTTCAGTTTGATA	GTF2A2	2958
AGTTCTGAGTGTGACCGAGA	BCL2L11	10018
AGTTCTGCAGCACATAGGTG	CUL4A	8451
AGTTCTTCAGTCATGGCCAG	SDAD1	55153
AGTTCTTGAATGTAGAGATG	BIRC5	332
AGTTCTTTACCTTTACCAGA	ATP6V1E1	529
AGTTCTTTCATCTTGAAGCT	PSMA8	143471
AGTTGAAATCAAAGTCATCC	STAT3	6774
AGTTGAAGATCCCATACGAG	SEC11A	23478
AGTTGACAGAGACACAGTAC	MAU2	23383
AGTTGAGCACAGCAGACACA	DDX56	54606
AGTTGCTAAACAGTTGGCAT	JAK2	3717
AGTTGCTGGACCAAACAGTG	NUP133	55746
AGTTGGAGAACGAGTATGGC	MED8	112950
AGTTGGATGATATGACACTG	SIRT1	23411
AGTTGGATGCTGCAATAGCA	MSTO1	55154
AGTTGTAATCAAATCCACAC	GTF2B	2959
AGTTGTCCTGTAGTTCGAAT	ABCE1	6059
AGTTGTGCATCCAGAGTACG	MED25	81857
AGTTGTTGTTAAAATTCTCA	CSNK2A1	1457
AGTTGTTTCTTCTTCAATGG	EQTN	54586
AGTTTACCAGCAAGCTACAT	CUL2	8453
AGTTTACCTGATAGTCCACG	CSNK2A2	1459
AGTTTATAAACCACTCTCCC	CNOT4	4850
AGTTTATCGTACCCAAGTTG	RASA2	5922
AGTTTCACTTGATACTCTTC	SUV39H2	79723
AGTTTGAGACATATCTTCGG	XPC	7508
AGTTTGCCAAAAAGGAAACC	LACE1	246269
AGTTTGCTCACATCTCTTGG	TAF9B	51616
AGTTTGTATTCCACTTCTCA	UBE2U	148581
AGTTTGTGGAGCGAACACTG	UBA1	7317
ATAAAACAGTCATTCTCTTG	UBE3D	90025
ATAAACAAATTCTTCTATCC	SH3GLB1	51100
ATAAACAACAACTGCCACAG	RAB6A	5870
ATAAACACAAATGTAAGCGC	ASH1L	55870
ATAAACCTACAACAAAGACG	CNOT4	4850
ATAAACCTTCTCGTGCCCAG	HTR3E	285242
ATAAACTGAAAAATACTTTG	LIAS	11019
ATAAACTGGGAATGGCTGGA	DOLPP1	57171
ATAAAGATGAACAGTTACAC	RICTOR	253260
ATAAAGGGTGTTATAAACAT	SPTLC2	9517
ATAAAGTTATTGCTAAGTGT	SLC35A1	10559
ATAAATTCAAGGATCTCTAC	DCUN1D3	123879
ATAAATTCTGAAATTCTGTG	CUL1	8454
ATAACAACCCAACTGATCAT	BIRC6	57448
ATAACACAAAAACAACCCAG	WWP1	11059
ATAACACAAAGACTACAACC	NEDD4L	23327
ATAACACTCGCACGACCCAG	WWP2	11060
ATAACTTGTACATGCAACCA	CUL3	8452
ATAAGAGGCTGGGCTGACGA	RAC2	5880
[truncated: 7,159 more rows]
